# Supplementary material for: Leverage points to improve smoking cessation treatment in a large tertiary care hospital: a systems-based mixed methods study
Source: PubMed Central journal article supplement — BMJ Open. 2019 Jul 2;9(7):e030066. doi: 10.1136/bmjopen-2019-030066 (PMC6609123; doi:10.1136/bmjopen-2019-030066), 2019-07-02
Supplement: bmjopen-2019-030066.draft_revisions.pdf [file bmjopen-2019-030066.draft_revisions.pdf]

# BMJ Open

BMJ Open is committed to open peer review. As part of this commitment we make the peer review history of every article we publish publicly available.

When an article is published we post the peer reviewers' comments and the authors' responses online. We also post the versions of the paper that were used during peer review. These are the versions that the peer review comments apply to.

The versions of the paper that follow are the versions that were submitted during the peer review process. They are not the versions of record or the final published versions. They should not be cited or distributed as the published version of this manuscript.

BMJ Open is an open access journal and the full, final, typeset and author-corrected version of record of the manuscript is available on our site with no access controls, subscription charges or pay-per-view fees (<http://bmjopen.bmj.com>).

If you have any questions on BMJ Open's open peer review process please email [info.bmjopen@bmj.com](mailto:info.bmjopen@bmj.com)

# BMJ Open

## Mapping the Way to Improved Hospital Smoking Cessation Treatment: A Systems Approach with Mixed Methods

|                               |                                                                                                                                                                                                                                                                                                                                                                                                                                                                       |
|-------------------------------|-----------------------------------------------------------------------------------------------------------------------------------------------------------------------------------------------------------------------------------------------------------------------------------------------------------------------------------------------------------------------------------------------------------------------------------------------------------------------|
| Journal:                      | <i>BMJ Open</i>                                                                                                                                                                                                                                                                                                                                                                                                                                                       |
| Manuscript ID                 | bmjopen-2019-030066                                                                                                                                                                                                                                                                                                                                                                                                                                                   |
| Article Type:                 | Research                                                                                                                                                                                                                                                                                                                                                                                                                                                              |
| Date Submitted by the Author: | 25-Feb-2019                                                                                                                                                                                                                                                                                                                                                                                                                                                           |
| Complete List of Authors:     | Ramsey, Alex; Washington University School of Medicine in Saint Louis, Psychiatry<br>Prentice, Donna; Barnes-Jewish Hospital, Department of Research for Patient Care Services<br>Ballard, Ellis; Washington University in Saint Louis, Brown School of Social Work and Public Health<br>Chen, Li-Shiun; Washington University School of Medicine in Saint Louis, Psychiatry<br>Bierut, Laura J.; Washington University School of Medicine in Saint Louis, Psychiatry |
| Keywords:                     | HEALTH SERVICES ADMINISTRATION & MANAGEMENT, Protocols & guidelines < HEALTH SERVICES ADMINISTRATION & MANAGEMENT, Quality in health care < HEALTH SERVICES ADMINISTRATION & MANAGEMENT, INTERNAL MEDICINE, PREVENTIVE MEDICINE, QUALITATIVE RESEARCH                                                                                                                                                                                                                 |
|                               |                                                                                                                                                                                                                                                                                                                                                                                                                                                                       |

SCHOLARONE™  
Manuscripts

1  
2  
3 **Mapping the Way to Improved Hospital Smoking Cessation Treatment:**  
4  
5 **A Systems Approach with Mixed Methods**  
6  
7  
8  
9

10  
11  
12 Alex T. Ramsey, Ph.D.<sup>1</sup>, Donna Prentice, Ph.D., R.N.<sup>2</sup>, Ellis Ballard, M.S.W., M.P.H.<sup>3</sup>, Li-Shiun  
13  
14 Chen, M.D., M.P.H., Sc.D.<sup>1</sup>, Laura J. Bierut, M.D.<sup>1</sup>  
15  
16

17  
18  
19 <sup>1</sup>Department of Psychiatry, Washington University School of Medicine, St. Louis, MO, USA  
20

21 <sup>2</sup>Department of Research for Patient Care Services, Barnes-Jewish Hospital, St. Louis, MO, USA  
22

23 <sup>3</sup>Brown School of Social Work and Public Health, Washington University, St. Louis, MO, USA  
24  
25  
26  
27

28 Corresponding Author:  
29

30  
31 Alex T. Ramsey, Ph.D.  
32 Department of Psychiatry  
33 Washington University School of Medicine  
34 660 South Euclid  
35 St. Louis, MO 63110, USA  
36 Phone: (314) 362-5370  
37 Email: aramsey@wustl.edu  
38  
39  
40  
41  
42  
43  
44  
45

46 Manuscript Word Count: 3167 words  
47  
48  
49  
50  
51  
52  
53  
54  
55  
56  
57  
58  
59  
60

## ABSTRACT

**Objectives:** To generate system insights on patient and provider levers and strategies that must be activated to improve hospital-based smoking cessation treatment.

**Design:** Mixed methods study including a series of in-depth group model building sessions, which informed the design of an online survey completed by healthcare providers and a structured interview protocol administered at the bedside to patients who smoke.

**Setting:** Large, tertiary care hospital in the Midwestern United States.

**Participants:** *Group model building:* 28 healthcare providers and 22 previously-hospitalized patients; *Online survey:* 308 healthcare providers; *Bedside interviews:* 205 hospitalized patients.

**Primary and Secondary Outcome Measures:** Hypothesis-generating, participatory qualitative methods informed the examination of the following quantitative outcomes: patient interest versus provider perception of patient interest in smoking cessation and treatment; patient-reported receipt versus provider-reported offering of inpatient smoking cessation interventions; and priority ratings of importance and feasibility of strategies to improve treatment.

**Results:** *System insights* included patients frequently leaving the floor to smoke, which created major workflow disruption. *Leverage points* included interventions to reduce withdrawal symptoms, and *action ideas* included nurse-driven protocols for timely administration of nicotine replacement therapy. Quantitative data corroborated system insights; for instance, 80% of providers reported that patients frequently leave the floor to smoke, leading to safety risks, missed assessments, and inefficient use of staff time. Patients reported significantly lower rates of receiving any smoking cessation interventions, as compared to provider reports (mean diff=17.4%-33.7%,  $p<.001$ ). Although 92% of providers cited patient interest as a key barrier, only 4% of patients indicated no interest in quitting or reducing smoking.

1  
2  
3 **Conclusions:** Engaging hospital providers and patients in participatory approaches to develop an  
4 implementation strategy revealed discrepant perceptions of patient interest and frequency of  
5 hospital-based treatment for smoking. These findings spurred adoption of standardized point-of-  
6 care treatment for cigarette smoking, which remains highly prevalent yet undertreated among  
7 hospitalized patients.  
8  
9  
10  
11  
12  
13  
14  
15  
16

### 17 **STRENGTHS AND LIMITATIONS**

- 19 • Using a systems science lens, this study integrated multiple data sources to inform more  
20 systematic provision of smoking cessation treatment practices in hospital settings.  
21
- 22 • This study featured a rigorous mixed methods approach whereby hypothesis-generating  
23 qualitative data informed the design of quantitative instruments and guided interpretation  
24 of resulting quantitative data.  
25
- 26 • The use of participatory approaches to engage healthcare provider and patient  
27 stakeholders identified provider and patient levers to be activated in a robust  
28 implementation strategy.  
29
- 30 • Despite having many similarities to other healthcare systems in the nation, study findings  
31 are based in one large tertiary care hospital system in the Midwestern United States.  
32  
33  
34  
35  
36  
37  
38  
39  
40  
41  
42  
43  
44  
45  
46  
47  
48  
49  
50  
51  
52  
53  
54  
55  
56  
57  
58  
59

## INTRODUCTION

Cigarette smoking remains the leading cause of preventable death worldwide.[1–4] National efforts directed at reducing tobacco use have contributed to a decline in the proportion of combustible cigarette smokers.[5,6] However, smoking prevalence remains high among those entering hospital settings, presenting an opportune time to promote cessation.[7–9]

Despite the existence of effective, FDA-approved medications for smoking cessation—including nicotine replacement therapy, varenicline, and bupropion[10–12]—which can be combined with brief counseling for optimal success,[13] these treatments remain underutilized in inpatient settings.[14–16] In our hospital, only 18–24% of patients who smoke received smoking cessation pharmacotherapy during hospitalization from 2010 to 2016.[9] Further, these medications were often prescribed inconsistently between admitting services and sub-demographic groups in our hospital. For instance, African Americans were 35% less likely than European Americans to receive smoking cessation pharmacotherapies during their hospital stay, which highlights concerning inequalities in hospital prescribing practices.[9]

These treatment gaps and disparities emerge as a result of a complex, dynamic system of care. To develop actionable strategies, we explored the underlying system structure producing these gaps and incorporated multiple stakeholder perspectives and data sources.[17–20] Engaging with a set of patient and healthcare provider stakeholders, we identified optimal leverage points to yield consistent delivery of inpatient smoking cessation care.

### Study purpose

The goal of the study was to understand determinants of treatment underutilization for inpatients who smoke and inform the development of stakeholder-supported strategies for improving smoking cessation treatment delivery in the inpatient setting. Building on our robust,

1  
2  
3 validated electronic health record data demonstrating suboptimal smoking cessation  
4  
5 pharmacotherapy prescription practices,[9] this study integrated multiple data sources to inform  
6  
7 more systematic provision of smoking cessation treatment practices in hospital settings.  
8  
9

## 10 **METHODS**

11  
12 This mixed methods study integrated qualitative and quantitative data sources including  
13  
14 in-depth group model building sessions with healthcare providers and patients,[20,21] followed  
15  
16 by an online survey with healthcare providers and bedside interviews with patients.  
17  
18

### 19 **Phase I: Group model building (qualitative work)**

#### 20 *Participants and procedures*

21  
22 Participants were recruited from Barnes-Jewish Hospital (BJH), a large tertiary care  
23  
24 hospital. We engaged two participant populations: (1) BJH employees including physicians,  
25  
26 nurses, and support staff with patient contact and (2) patients who had recently received care at  
27  
28 BJH and who self-identified as current smokers at the time of their most recent hospital  
29  
30 admission. To recruit providers, we requested program directors and nursing supervisors of a  
31  
32 diverse set of service lines to distribute recruitment materials to employees who may be eligible  
33  
34 to participate. To recruit patients who had been previously hospitalized at BJH, we distributed a  
35  
36 recruitment email through a research participant registry to potentially eligible individuals who  
37  
38 smoke, posted a Facebook advertisement on the registry fan page listing, and hung printed flyers  
39  
40 in the hospital. Those interested in participating were screened using a standardized telephone  
41  
42 script.  
43  
44  
45  
46  
47  
48

49 We engaged 50 stakeholders in five group model building sessions comprised of patients  
50  
51 (2 sessions, n=22), nurses, social workers, and case managers (1 session, n=14), nurse  
52  
53 practitioners, hospitalists, and pharmacists (1 session, n=6), and resident physicians (1 session,  
54  
55  
56  
57  
58  
59  
60

1  
2  
3 n=8). We then reconvened a select group of participants from the initial sessions with  
4  
5 representation across all provider groups to synthesize perspectives and refine the stakeholder-  
6  
7 generated model (1 session, n=16). Patients and providers stemmed from a wide variety of  
8  
9 hospital service lines, including cardiology, general surgery, internal medicine, obstetrics,  
10  
11 oncology, and psychiatry. Sessions were conducted between late October 2017 and early  
12  
13 February 2018.  
14  
15

16  
17 Planning, conduct, and analysis of the series of sessions was led by a Core Modeling  
18  
19 Team, including the principal investigator, BJH nursing partner, and two experts in group model  
20  
21 building and community-based system dynamics. Each group model building session utilized a  
22  
23 Facilitation Team, which included the *conveners/closers* (principal investigator and nursing  
24  
25 partner), *primary modeler* (lead expert in group model building), *facilitators* (~2 support experts  
26  
27 in group model building), and *note takers* (~2 additional team members). The group model  
28  
29 building team used scripts,[22] or a pre-defined set of exercises and behaviors, to provide a semi-  
30  
31 structured environment for stakeholder groups to model a typical sequence of clinical decision  
32  
33 points with regard to ordering and administering smoking cessation pharmacotherapy and  
34  
35 offering counseling in the hospital. Participants were asked to identify factors that determine the  
36  
37 likelihood of offering smoking cessation pharmacotherapy and counseling, the likelihood of  
38  
39 patients accepting pharmacotherapy and counseling, sources of decision-making, and workflow  
40  
41 barriers. Participants were then asked to prioritize the identified factors and position them as  
42  
43 intervening variables within the modeled sequence of events.  
44  
45  
46  
47  
48

#### 49 *Mixed methods analytic approach*

50

51 We used an exploratory sequential design in which qualitative data from the group model  
52  
53 building sessions informed the design of the quantitative online survey and patient bedside  
54  
55  
56  
57  
58  
59  
60



1  
2  
3 interviews.[23] The qualitative data were hypothesis-generating to further guide the development  
4  
5 of the quantitative measures and interpretation of the resulting quantitative data.  
6

## 7 **Phase II: Online survey (quantitative and qualitative)**

### 8 *Participants and procedures*

9  
10 We recruited healthcare providers to complete an anonymous 10 minute online survey by  
11  
12 emailing a cover letter and survey link to administrative contact persons, program directors, and  
13  
14 nursing staff who then distributed the email through their networks. Participants of the online  
15  
16 survey included 308 providers (112 physicians, 196 nurses) from BJH with direct inpatient  
17  
18 contact. Participants were located across a wide range of service lines, with internal medicine  
19  
20 (46%) and general surgery (22%) being the most highly represented. Of physicians, 79% were  
21  
22 resident physicians, and 21% were hospitalists. Of nurses, 47% were staff nurses, 30% nurse  
23  
24 practitioners, and 23% other types of nurses. Nurses and physicians were asked about their  
25  
26 current smoking cessation treatment practices—namely the use of the “5A’s”: *Ask* about tobacco  
27  
28 use, *Advise* to quit smoking, *Assess* readiness for quit attempt, *Assist* with medication and  
29  
30 counseling options, and *Arrange* follow-up contact or referral,[24–26] barriers to using these  
31  
32 practices, perceived patient interest in various smoking cessation resources during an inpatient  
33  
34 stay, perceived importance and feasibility of various potential strategies to improve practices,  
35  
36 and the frequency of workflow and safety issues related to hospitalized patient smoking. The  
37  
38 online survey remained open from late February 2018 to late March 2018.  
39  
40  
41  
42  
43  
44  
45

## 46 **Phase III: Bedside interviews (quantitative)**

### 47 *Participants and procedures*

48  
49 We recruited hospitalized patients to complete a structured 5-minute interview at the  
50  
51 bedside. We obtained reports daily during the month of May 2018 from the hospital electronic  
52  
53  
54  
55  
56  
57  
58  
59  
60

1  
2  
3 health record to identify potentially eligible patients and conducted all interviews during this  
4 time period. Participants of the bedside interviews included 205 inpatients who were categorized  
5 by electronic health record as current smokers and nearing hospital discharge. Reflecting the  
6 underlying population of patients who were current smokers during this time frame, participants  
7 were more often male (56%) and Caucasian (59%), with a median age of 54 ( $M=50.25$ ;  
8  $SD=15.22$ ). On average, participants smoked 14.0 cigarettes per day and had stayed in the  
9 hospital for 4.5 days within a variety of admitting services, including internal medicine (38%),  
10 surgery (23%), oncology (13%), cardiology (12%), neurology (7%), and orthopedics (5%).  
11 Patients were asked about their smoking behaviors, the smoking cessation care they had received  
12 during their current inpatient stay, interest in and experience with attempting to quit smoking,  
13 and the importance of various potential strategies to improve practices.  
14  
15  
16  
17  
18  
19  
20  
21  
22  
23  
24  
25  
26  
27

### 28 **Patient and public involvement**

29  
30 During participant recruitment, patients were able to identify other potentially eligible  
31 individuals who smoke to be screened for enrollment. Through the participatory group model  
32 building sessions, patients generated key system insights that informed the research questions  
33 and outcome measures to be assessed in the subsequent online survey for healthcare providers  
34 and bedside interview protocol for patients. For instance, patients expressed significant  
35 frustration regarding being asked repeatedly about their smoking behaviors without being offered  
36 any help to quit smoking during their hospital stay. As a result, the research team prioritized  
37 questions in the quantitative instruments to assess the frequency of patient- and provider-reported  
38 delivery of smoking cessation interventions, as well as patient and provider reports of patient  
39 interest in receiving smoking cessation treatment while hospitalized. This research reflects a key  
40 step in developing a system-level intervention; therefore, patient input is contributory to ongoing  
41  
42  
43  
44  
45  
46  
47  
48  
49  
50  
51  
52  
53  
54  
55  
56  
57  
58  
59  
60

1  
2  
3 research and practice improvements. We plan to disseminate results of this study to patients and  
4 other participants by presenting findings at local symposia and conferences that are well attended  
5 by patients, patient advocates, healthcare providers, and the broader community. We will also  
6 present these findings during healthcare provider training workshops, whereby patients benefit  
7 through improved quality of smoking cessation care in the hospital.  
8  
9  
10  
11  
12  
13

## 14 RESULTS

### 15 Phase I: Group model building

#### 16 *System insights*

17  
18  
19  
20  
21 Based on factors prioritized by participants during group model building, the research  
22 team generated a multilevel (i.e., individual, hospital, community, policy) understanding,  
23 referred to as system insights, that characterized the observed treatment underutilization. These  
24 insights included *provider* reports of patients frequently leaving the floor to smoke, which  
25 created major workflow problems and enhanced provider receptivity to solutions framed to  
26 address “nicotine withdrawal” rather than “cessation”. *Providers* also reported a lack of  
27 awareness of resources, and enthusiasm balanced with concerns about time, while *patients*  
28 reported infrequent receipt of smoking cessation support and preferences for non-judgmental  
29 communication (see Table 1).  
30  
31  
32  
33  
34  
35  
36  
37  
38  
39  
40  
41

#### 42 *Potential leverage points*

43  
44  
45 With these system insights providing the appropriate frame, the modeling group then  
46 identified potential leverage points to target for action. Potential leverage points to address  
47 provider-reported insights included interventions framed as solutions to reduce nicotine  
48 withdrawal and subsequent workflow problems, education and decision support, and a  
49 standardized approach to smoking cessation treatment. Potential leverage points to address  
50  
51  
52  
53  
54  
55  
56  
57  
58  
59  
60

1  
2  
3 patient-reported insights included transparency of patient interest and use of treatment and  
4  
5 patient-provider rapport through more supportive cessation messaging (see Table 1).  
6

7  
8 *Action ideas*  
9

10 Finally, stakeholders used these potential leverage points as the frame for nominating  
11 potential concrete solutions and then prioritizing them on perceived importance and feasibility in  
12 the hospital setting. Action ideas to address provider-reported insights and leverage points  
13 included implementing nurse-driven protocols for timely administration of inpatient nicotine  
14 replacement therapy, using an assortment of provider training approaches, designing electronic  
15 health records to support point-of-care decisions, and offering point-of-care advice, medication,  
16 and links to outpatient counseling. Action ideas to address patient-reported insights and leverage  
17 points included generating provider feedback, developing cessation plans for discharge, offering  
18 help to every patient who smokes, and revamping hospital signage for more positive messaging  
19 (see Table 1). These system insights, potential leverage points, and action ideas were then  
20 examined more closely in the subsequent online survey with providers and bedside interviews  
21 with patients.  
22  
23  
24  
25  
26  
27  
28  
29  
30  
31  
32  
33  
34  
35  
36  
37  
38  
39  
40  
41  
42  
43  
44  
45  
46  
47  
48  
49  
50  
51  
52  
53  
54  
55  
56  
57  
58  
59  
60

**Table 1. Linking stakeholder-generated system insights with potential leverage points and action ideas**

| Viewpoint | System Insights                                                                                                                                                                                  | Potential Leverage Points                                                                                                                         | Action Ideas                                                                                                                                                                                                                                                      | Representative Quote                                                                                                                                                                                                                                                                           |
|-----------|--------------------------------------------------------------------------------------------------------------------------------------------------------------------------------------------------|---------------------------------------------------------------------------------------------------------------------------------------------------|-------------------------------------------------------------------------------------------------------------------------------------------------------------------------------------------------------------------------------------------------------------------|------------------------------------------------------------------------------------------------------------------------------------------------------------------------------------------------------------------------------------------------------------------------------------------------|
| Provider  | Patients frequently leave the floor to smoke, which creates major workflow problems; as a result, providers are more compelled by “reducing nicotine withdrawal” rather than “cessation” efforts | Interventions to reduce nicotine withdrawal symptoms and framing solutions around nicotine replacement and workflow to foster provider engagement | Use nurse-driven protocols to ensure that readily accessible nicotine replacement therapy can be provided to inpatients with little delay                                                                                                                         | <i>“People go down to smoke and they miss meds and even appointments which is so frustrating.”</i><br>– [Staff nurse]                                                                                                                                                                          |
| Provider  | Providers lack awareness of existing cessation resources to connect patients at discharge, which negatively impacts their willingness to provide inpatient smoking cessation care                | Education and decision support                                                                                                                    | Use continuing medical education, roving in-services, quick reference tools, and brief videos to train providers on how to implement existing and effective treatments<br><br>Design electronic health record modules to support point-of-care treatment decision | <i>“I would like to know more about free or low-cost smoking cessation treatment centers to which I can refer my patients...if there was some way they could get [medications] at low cost along with smoking cessation therapy, I think that would be beneficial.”</i> – [Resident physician] |
| Provider  | Enthusiasm to improve inpatient smoking cessation is balanced by concern about demands and limited time                                                                                          | Standardized and coordinated approach to smoking cessation treatment                                                                              | Provide point-of-care brief advice, opt-out medication, and discharge links to community resources, including quit-line counseling, to every patient who smokes                                                                                                   | <i>“Most of us would love to help them quit smoking, but it is time consuming...thereby making it feel very much like extra work and easily dropped when busy.”</i> – [Resident physician]                                                                                                     |
| Patient   | Patients are often asked about their smoking but very rarely assisted with cessation                                                                                                             | Transparency regarding patient interest in and use of treatment                                                                                   | Give providers feedback on individual and aggregate rates of offering smoking cessation treatment, as well as patient interest and engagement with cessation support<br><br>Develop cessation plan for discharge                                                  | <i>“I’m so tired of being asked if I’m a smoker without being offered help to quit. It seems like they are only asking so that they can check a box and move on.”</i> – [Patient]                                                                                                              |
| Patient   | Patients are more compelled by positive and non-judgmental communication                                                                                                                         | Patient-provider rapport through more supportive cessation messaging                                                                              | Ask every patient who smokes if they would like help to quit smoking<br><br>Revamp hospital signage to incorporate positive messaging on smoking cessation                                                                                                        | <i>“The more respect staff gives, the more honest the conversation is, and the more likely I will be to accept treatment.”</i> – [Patient]                                                                                                                                                     |

## Phase II: Healthcare provider online survey

### *Qualitative data*

Open-ended responses from the provider sample were useful in expanding further upon the group model building data. Key representative quotes are included in Table 1 to reinforce themes from the group model building sessions.

### *Quantitative data*

Rates of smoking cessation practice varied substantially across the 5A's, with the majority of providers indicating regular completion of *Ask* (88%), *Advise* (79%), *Assess* (62%), and *Assist* (63%), with lower rates for *Arrange* (24%). Additionally, 64% of providers reported that they often-to-always encourage use of medication (e.g., nicotine replacement therapy, varenicline) with patients for smoking cessation.

The most commonly cited barriers to providing treatment were patient lack of interest (92%) and compliance (92%), followed by lack of awareness of existing community resources for patient referral (72%) and lack of time (71%).

Approximately 80% of providers reported that patients often or very often leave the floor to smoke and that this frequently leads to patients posing a safety risk (75% reported often or very often), assessments being missed (51% reported often or very often), and staff time used to escort patients off the floor (42% reported often or very often).

The strategies rated as most important for improving smoking cessation treatment at the hospital were also the ones rated as most feasible. These top strategies included asking every patient who smokes if they want help (86% endorsed as very or extremely important; 77% endorsed as very or extremely feasible), offering brief advice to every patient who smokes (65% endorsed as very or extremely important; 56% endorsed as very or extremely feasible), and

offering medication to every patient who smokes (62% endorsed as very or extremely important; 52% endorsed as very or extremely feasible).

### Phase III: Patient bedside interviews

Table 2 highlights high levels of patient smoking cessation interest and attempts. In particular, nearly three-fourths (73%) were interested in quitting now, and nearly all (96%) were interested in quitting or smoking less. Most patients (59%) had tried quitting in the past year. Nearly two-thirds (65%) had ever used e-cigarettes, and 12% currently used them.

**Table 2. High patient demand to quit smoking**

| Variables                                           | Patients No. (%) |
|-----------------------------------------------------|------------------|
| Interested in quitting now                          | 146/200 (73)     |
| Interested in quitting now or later                 | 188/202 (93)     |
| Interested in quitting now or later or smoking less | 193/202 (96)     |
| Past year quit attempt                              | 118/201 (59)     |
| Ever used e-cigarettes                              | 131/202 (65)     |
| Currently used e-cigarettes                         | 25/202 (12)      |

Patient-reported receipt of 5A's smoking cessation practices were examined in relation to provider reports using summary independent-sample t-test analyses (see Figure 1). Although patients reported rates similar to providers on *Ask* (mean diff= -1.4%;  $p=0.653$ ), they reported much lower rates of receiving *Advise* (mean diff= -27.5%;  $p<.001$ ), *Assess* (mean diff= -33.7%;  $p<.001$ ), *Assist* (mean diff= -19.2%;  $p<.001$ ), and *Arrange* (mean diff= -17.4%;  $p<.001$ ) steps, as well as being provided with medication to quit smoking during their inpatient stay (mean diff= -35.0%;  $p<.001$ ; see Figure 2). Additionally, in contrast to 92% of providers citing patient interest as a key barrier to smoking cessation treatment, only 4% of patients indicated no interest in

1  
2  
3 quitting at some point or smoking less, and only 27% of patients indicated no interest in quitting  
4  
5 now.  
6

7  
8 Nearly one-third (31%) of patients reported that they had left the floor to go smoke  
9  
10 during their hospital stay, and nearly two-thirds of those who left did so multiple times per day.  
11  
12 Overall, receipt of inpatient smoking cessation medication was not significantly associated with  
13  
14 leaving the floor to smoke ( $p=.331$ ). However, among patients who left, those who did not  
15  
16 receive smoking cessation medications were more likely to report leaving multiple times per day  
17  
18 than those who received medications, controlling for cigarettes per day and length of stay  
19  
20 (OR=3.3,  $p=.036$ ).  
21  
22

23  
24 Patients were well-aligned with providers regarding perceived importance of potential  
25  
26 strategies to improve smoking cessation treatment in the hospital (see Figure 3). The most highly  
27  
28 rated strategies were to ask every patient who smokes if they want help (76% endorsed as very or  
29  
30 extremely important), offer medication to every patient who smokes (67%), and offer brief  
31  
32 advice to every patient who smokes (58%).  
33  
34

## 35 DISCUSSION

36  
37 Healthcare providers reported that patient smoking during a hospitalization created  
38  
39 significant workflow issues for hospital staff. Despite low current rates of smoking cessation  
40  
41 pharmacotherapy prescribing, we found high patient demand to quit smoking. Provider-reported  
42  
43 barriers centered on a perceived lack of patient interest, time, and awareness of existing  
44  
45 resources; these barriers reflect aspects of motivation, opportunity, and capability, which have  
46  
47 been identified as key determinants of behavioral change and fruitful targets for  
48  
49 intervention.[27,28] Importantly, providers were much more receptive to and compelled by  
50  
51 approaches to prevent the chain of events involving nicotine withdrawal, patients leaving the  
52  
53  
54  
55  
56  
57  
58  
59  
60



1  
2  
3 floor to smoke, and workflow problems than approaches framed as promoting smoking cessation  
4 among hospitalized patients. This finding has significant implications for approaches to engaging  
5 hospital providers in the treatment of inpatients who smoke.  
6  
7  
8  
9

10 Interestingly, based on patient reports, receipt of nicotine replacement therapy was not  
11 associated with whether or not patients left the floor to smoke at least once; however, patients  
12 receiving nicotine replacement therapy were more likely to have only left the floor to smoke  
13 once. Therefore, it is possible that patients may have been receiving nicotine replacement  
14 therapy *in response to* leaving the floor to smoke (e.g., missing patient prompts the provider to  
15 offer treatment for nicotine withdrawal), thereby reducing the likelihood that patients  
16 subsequently left due to nicotine withdrawal during their hospital stay. This hypothesis would  
17 require further testing, including an establishment of temporal precedence, to demonstrate risk of  
18 patient smoking before and after receiving nicotine replacement therapy in the hospital setting.  
19  
20  
21  
22  
23  
24  
25  
26  
27  
28  
29

30 Regarding points of (mis)alignment between patient and provider perceptions, both  
31 groups reported high rates of asking patients whether or not they smoke. However, patients  
32 reported much lower rates of receiving any smoking cessation support and much higher levels of  
33 interest in cessation, as compared to provider reports. This finding replicates recent research in  
34 mental health settings,[24] and was corroborated by qualitative data, which characterized the  
35 patient perception that providers frequently ask about smoking behaviors yet no actions result  
36 from these inquiries. Improved alignment of perceptions could benefit patient-provider rapport  
37 and increase acceptance of smoking cessation treatments when offered—opportunities which  
38 were all raised by patients during group model building discussions.  
39  
40  
41  
42  
43  
44  
45  
46  
47  
48  
49  
50

51 Finally, patients and providers agreed that the most important strategies were to ask every  
52 patient who smokes if they want help and offer medication and brief advice to every patient who  
53  
54  
55  
56  
57  
58  
59  
60

1  
2  
3 smokes. Providers also found these to be the most feasible potential strategies, despite the patient  
4 reports that these were not frequently occurring. While seen as feasible, providers may perceive  
5 the need for a hospital-wide program that expects, supports, and reinforces the practice of  
6 offering treatment to every patient who smokes. As noted in a recent systematic review,[28]  
7 standardized implementation of this type of opt-out program that leverages lighter-touch point-  
8 of-care support may in fact ease provider burden and workflow. In addition, the alignment  
9 between patients and providers in ratings of importance and feasibility give additional credence  
10 to the viability of implementing these proposed strategies in hospital settings.

11  
12  
13  
14  
15  
16  
17  
18  
19  
20  
21  
22  
23  
24  
25  
26  
27  
28  
29  
30  
31  
32  
33  
34  
35  
36  
37  
38  
39  
40  
41  
42  
43  
44  
45  
46  
47  
48  
49  
50  
51  
52  
53  
54  
55  
56  
57  
58  
59  
60  
Limitations of this study include being based in one large tertiary care hospital system in  
the Midwestern United States. However, there are indications that this hospital system is largely  
representative of other systems in the nation. For instance, researchers recently found smoking  
cessation medication rates of 22.3% across 282 U.S. hospitals,[16] nearly identical to our rate of  
approximately 22% across years 2010-2016.

## CONCLUSION

Our findings have led our hospital to adopt standardized, lighter-touch yet higher-reach  
approaches to smoking cessation treatment, supported by provider feedback and simplified  
decision support and enabled through the electronic health record system.[7,19,29,30] The  
potential leverage points we identified point to the following specific strategies:

1. *Create a standardized and coordinated approach to smoking cessation treatment:*

Provide point-of-care brief advice, opt-out medication, and discharge links to community  
resources, including quit-line counseling, to every patient who smokes;

2. *Foster provider engagement by identifying and framing interventions as solutions to  
reduce nicotine withdrawal and subsequent workflow problems related to patients*

- 1  
2  
3       *leaving the floor to smoke*: Use nurse-driven protocols to ensure that readily accessible  
4  
5 nicotine replacement therapy can be provided to inpatients with little delay;  
6  
7  
8     3. *Offer positive, supportive, and non-judgmental messaging to patients*: Revamp hospital  
9  
10 signage to incorporate positive messaging on smoking cessation;  
11  
12     4. *Improve awareness, knowledge, self-efficacy, and attitudes*: Use continuing medical  
13  
14 education, roving in-services, and quick reference tools to train providers on existing and  
15  
16 effective treatments and how to implement them;  
17  
18     5. *Increase transparency regarding patient interest in and use of treatment*: Give providers  
19  
20 feedback on ongoing performance and aggregate rates of patient-reported readiness to  
21  
22 quit and engagement with quit-line counseling to foster awareness and accountability.  
23  
24  
25

26 Engaging hospital stakeholders through a process of self-identification of approaches to  
27  
28 addressable problems presents opportunities to fit high-leverage challenges with sustainable,  
29  
30 contextually-appropriate solutions. Findings from this study inform engagement with healthcare  
31  
32 provider and patient stakeholders in the development and implementation of proposed strategies  
33  
34 to facilitate consistent delivery of smoking cessation treatment practices in the hospital setting.  
35  
36  
37  
38  
39  
40  
41  
42  
43

## 44 **CONTRIBUTORS**

45  
46 ATR, L-SC, and LJB conceptualized and designed the study. ATR and DP led participant  
47  
48 recruitment and data collection. EB led the group model building sessions and synthesis of  
49  
50 qualitative data. ATR analyzed the qualitative and quantitative data and drafted the initial  
51  
52 manuscript. ATR, DP, EB, L-SC, and LJB contributed to manuscript revisions and approved the  
53  
54 final manuscript.  
55  
56  
57  
58  
59  
60

## FUNDING

Research reported in this paper was supported by National Institute on Drug Abuse (NIDA) grants K12DA041449, R01DA036583, R01DA038076, National Cancer Institute (NCI) grants U19CA203654, P30CA091842, and P30CA091842-16S2, and a grant from the Foundation for Barnes-Jewish Hospital.

## COMPETING INTERESTS

LJB is listed as an inventor on Issued U.S. Patent 8,080,371, “Markers for Addiction” covering the use of certain SNPs in determining the diagnosis, prognosis, and treatment of addiction. The other authors have no financial disclosures.

## ETHICS APPROVAL

This study was approved by an institutional review board in the Human Research Protection Office at Washington University in St. Louis (IRB ID: 201703162).

## DATA SHARING

Additional data may be available by emailing [aramsey@wustl.edu](mailto:aramsey@wustl.edu).

## REFERENCES

1. Samet JM. Tobacco smoking: the leading cause of preventable disease worldwide. *Thorac Surg Clin*. 2013;23(2):103-12.
2. Bauer UE, Briss PA, Goodman RA, et al. Prevention of chronic disease in the 21st century: elimination of the leading preventable causes of premature death and disability in the USA. *Lancet*. 2014;384(9937):45-52.
3. Yoon PW, Bastian B, Anderson RN, et al. Potentially preventable deaths from the five leading causes of death--United States, 2008-2010. *MMWR*. 2014;63(17):369-74.

- 1  
2  
3 4. Surgeon General. The health consequences of smoking—50 years of progress: A report of  
4  
5 the Surgeon General. [https://www.surgeongeneral.gov/library/reports/50-years-of-](https://www.surgeongeneral.gov/library/reports/50-years-of-progress/index.html)  
6  
7 progress/index.html. Accessed June 22, 2018.  
8  
9
- 10 5. Centers for Disease Control and Prevention. Trends in current cigarette smoking among  
11  
12 high school students and adults, United States, 1965–2014.  
13  
14 [http://www.cdc.gov/tobacco/data\\_statistics/tables/trends/index.htm](http://www.cdc.gov/tobacco/data_statistics/tables/trends/index.htm). Accessed June 22,  
15  
16 2018.  
17  
18
- 19 6. America’s Health Rankings. Health measures in the United States 2018 annual report.  
20  
21 <https://www.americashealthrankings.org/explore/annual/measure/Overall>. Accessed  
22  
23 December 14, 2018.  
24  
25
- 26 7. Nahhas GJ, Wilson D, Talbot V, et al. Feasibility of implementing a hospital-based “opt-  
27  
28 out” tobacco-cessation service. *Nicotine Tob Res*. 2016;19(8):937-43.  
29  
30
- 31 8. Rigotti N, Munafo MR, Stead LF. Interventions for smoking cessation in hospitalised  
32  
33 patients. *Cochrane Database Syst Rev*. 2007(3).  
34  
35
- 36 9. Srivastava AB, Ramsey AT, McIntosh, LD, et al. Tobacco use prevalence and smoking  
37  
38 cessation pharmacotherapy prescription patterns among hospitalized patients by medical  
39  
40 specialty. *Nicotine Tob Res*. 2018. doi:10.1093/ntr/nty031  
41  
42
- 43 10. Cahill K, Stevens S, Perera R, et al. Pharmacological interventions for smoking cessation: an  
44  
45 overview of reviews. *Cochrane Database Syst Rev*. 2013(5).  
46  
47
- 48 11. Stead LF, Perera R, Bullen C, et al. Nicotine replacement therapy for smoking cessation.  
49  
50 *Cochrane Database Syst Rev*. 2012(11).  
51  
52
- 53 12. Keating GM, Lyseng-Williamson KA. Varenicline. *Pharmacoecon*. 2010;28(3):231-54.  
54  
55  
56  
57  
58  
59  
60

13. Stead LF, Lancaster T. Combined pharmacotherapy and behavioural interventions for smoking cessation. *Cochrane Database Syst Rev*. 2012(10).
14. Fiore MC, Goplerud E, Schroeder SA. The Joint Commission's new tobacco-cessation measures—will hospitals do the right thing?. *N Engl J Med*. 2012;366(13):1172-4.
15. Katz DA, Stewart K, Paez M, et al. “Let me get you a nicotine patch”: nurses' perceptions of implementing smoking cessation guidelines for hospitalized veterans. *Mil Med*. 2016;181(4):373-82.
16. Pack QR, Priya A, Lagu TC, et al. Smoking cessation pharmacotherapy among smokers hospitalized for coronary heart disease. *JAMA Intern Med*. 2017;177(10):1525-7.
17. Diez Roux AV. Complex systems thinking and current impasses in health disparities research. *Am J Public Health*. 2011;101(9):1627-34.
18. Powell BJ, Beidas RS, Lewis CC, et al. Methods to improve the selection and tailoring of implementation strategies. *J Behav Health Serv Res*. 2017;44(2):177-94.
19. Geerligs L, Rankin NM, Shepherd HL, et al. Hospital-based interventions: a systematic review of staff-reported barriers and facilitators to implementation processes. *Implement Sci*. 2018;13(1):36.
20. Zimmerman L, Lounsbury DW, Rosen CS, et al. Participatory system dynamics modeling: Increasing stakeholder engagement and precision to improve implementation planning in systems. *Adm Policy Ment Health*. 2016;43(6):834-49.
21. Hovmand PS. *Community Based System Dynamics*. New York, NY: Springer; 2014.
22. Hovmand PS, Andersen DF, Rouwette E, et al. Group model-building ‘scripts’ as a collaborative planning tool. *Syst Res Behav Sci*. 2012;29(2):179-93.

- 1  
2  
3 23. NIH Office of Behavioral and Social Sciences. *Best practices for mixed methods research in*  
4 *the health sciences* (2nd ed). Bethesda: National Institutes of Health; 2018.  
5  
6
- 7  
8 24. Chen LS, Baker T, Brownson RC, et al. Smoking cessation and electronic cigarettes in  
9  
10 community mental health centers: patient and provider perspectives. *Community Ment*  
11 *Health J.* 2017;53(6):695-702.  
12  
13
- 14 25. Fiore MC, Baker TB. Treating smokers in the health care setting. *N Engl J Med.*  
15  
16 2011;365(13):1222-31.  
17  
18
- 19 26. Fiore MC, Jaén CR, Baker TB, et al. *Treating Tobacco Use and Dependence: 2008 Update.*  
20  
21 US Department of Health and Human Services; 2008.  
22  
23
- 24 27. Michie S, Atkins L, West R. *The Behavior Change Wheel: A Guide to Designing*  
25  
26 *Interventions.* Great Britain: Silverback Publishing; 2014.  
27  
28
- 29 28. Sharpe T, Alshalanee A, Ward KD, et al. Systematic review of clinician-reported barriers to  
30  
31 provision of smoking cessation interventions in hospital inpatient settings. *J Smok Cessat.*  
32  
33 2018;13(4):233-243.  
34  
35
- 36 29. Bernstein SL, Rosner J, DeWitt M, et al. Design and implementation of decision support for  
37  
38 tobacco dependence treatment in an inpatient electronic medical record: a randomized trial.  
39  
40 *Transl Behav Med.* 2017;7(2):185-95.  
41  
42
- 43 30. Rice VH, Heath L, Livingstone-Banks J, et al. Nursing interventions for smoking cessation.  
44  
45 *Cochrane Libr.* 2017(12).  
46  
47  
48  
49  
50  
51  
52  
53  
54  
55  
56  
57  
58  
59  
60

**Figure 1. Providers and patients report discrepant rates of inpatient smoking cessation treatment**

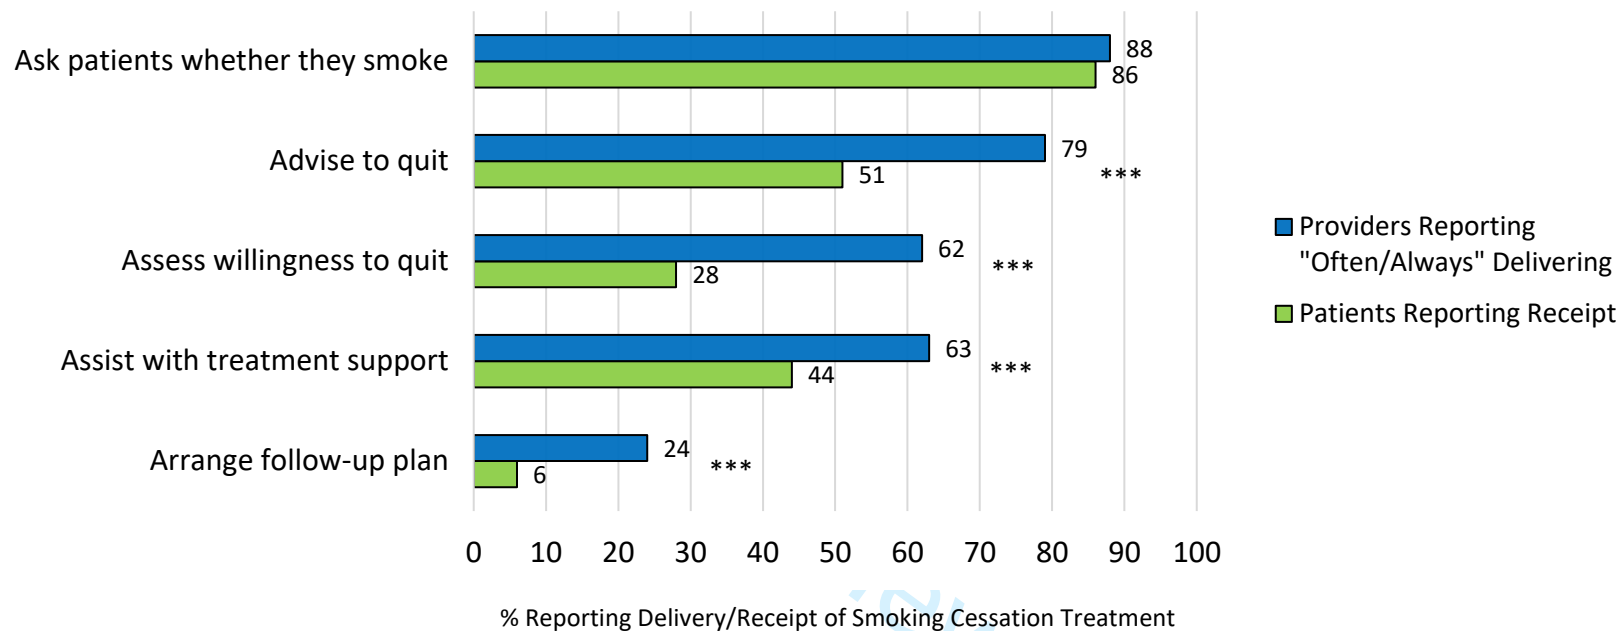

\*\*\*  $p < .001$



**Figure 2. Despite high interest, fewer patients receive pharmacologic cessation treatment than indicated by providers**

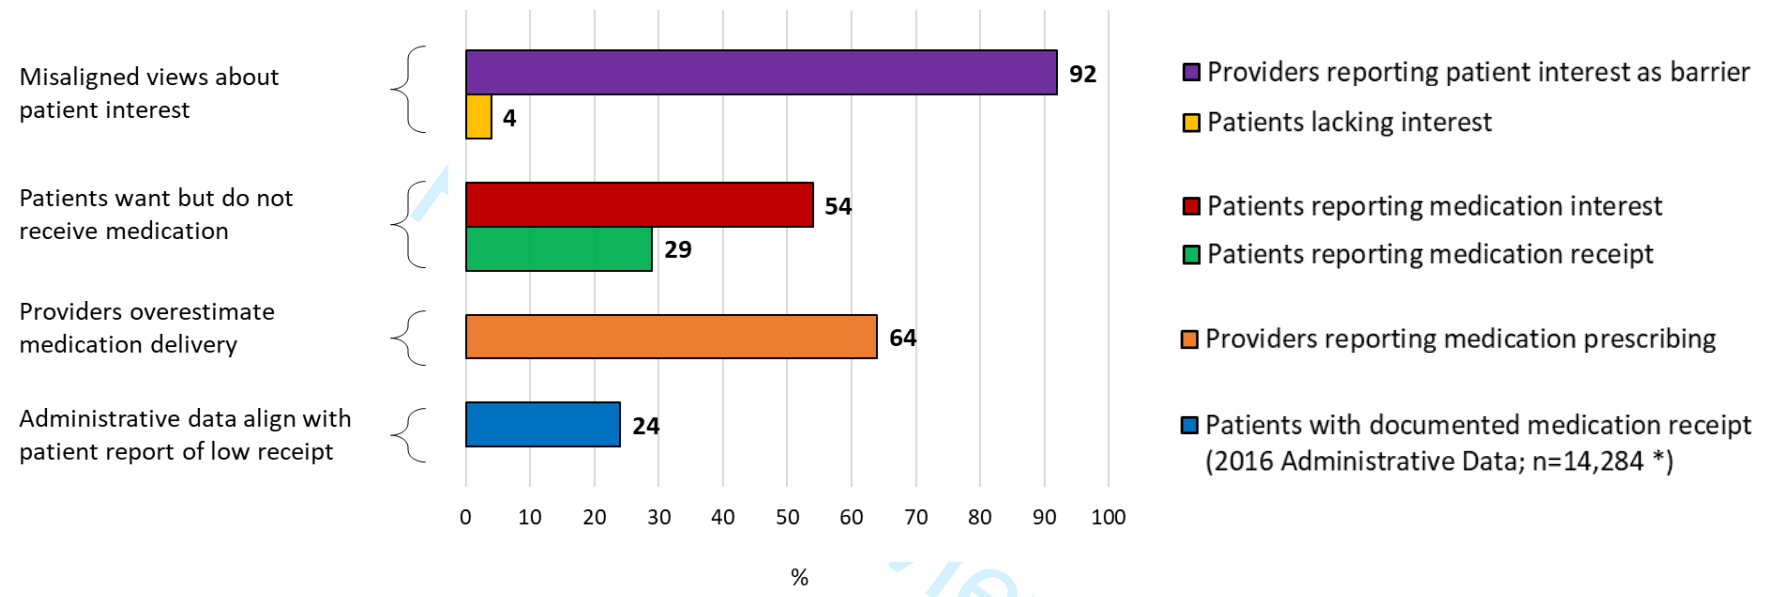

\* Adapted from Srivastava et al., 2018 [9]

view only

Figure 3. Potential strategies prioritized by importance and feasibility among stakeholders

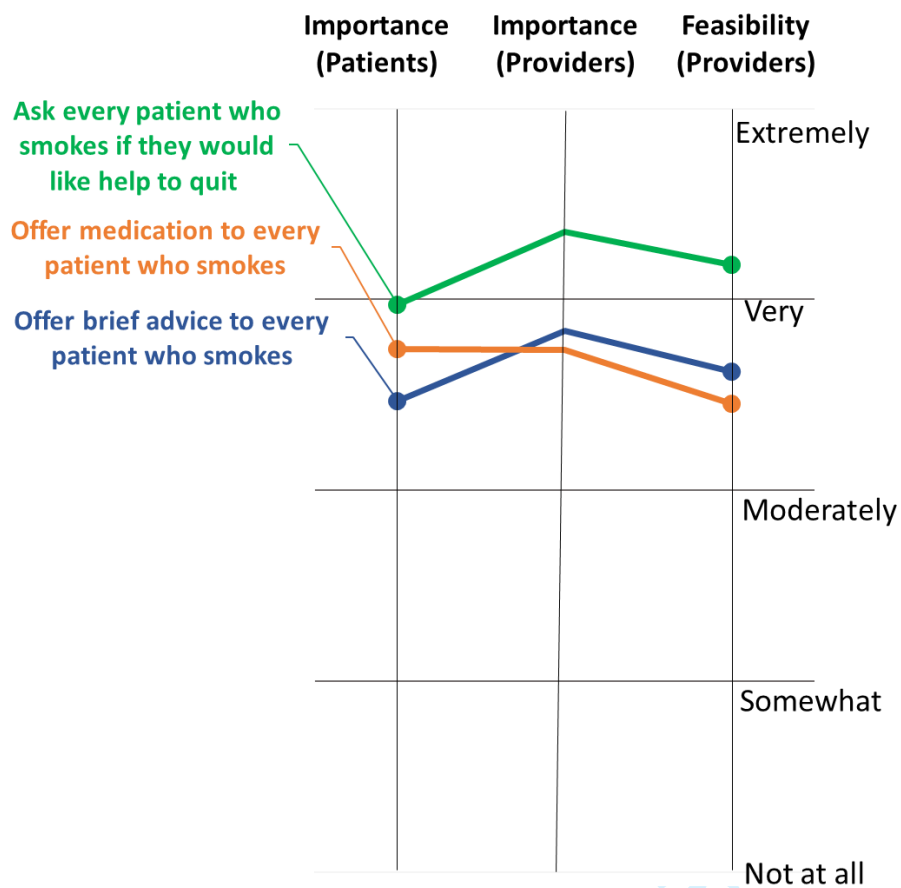

ew only

## Standards for Reporting Qualitative Research (SRQR)

O'Brien B.C., Harris, I.B., Beckman, T.J., Reed, D.A., & Cook, D.A. (2014). Standards for reporting qualitative research: a synthesis of recommendations. *Academic Medicine*, 89(9), 1245-1251.

| No. | Topic                                       | Item                                                                                                                                                                                                                                                                                                                                     | Status    |
|-----|---------------------------------------------|------------------------------------------------------------------------------------------------------------------------------------------------------------------------------------------------------------------------------------------------------------------------------------------------------------------------------------------|-----------|
|     | <b>Title and abstract</b>                   |                                                                                                                                                                                                                                                                                                                                          |           |
| S1  | Title                                       | Concise description of the nature and topic of the study identifying the study as qualitative or indicating the approach (e.g., ethnography, grounded theory) or data collection methods (e.g., interview, focus group) is recommended                                                                                                   | Addressed |
| S2  | Abstract                                    | Summary of key elements of the study using the abstract format of the intended publication; typically includes objective, methods, results, and conclusions                                                                                                                                                                              | Addressed |
|     | <b>Introduction</b>                         |                                                                                                                                                                                                                                                                                                                                          |           |
| S3  | Problem formulation                         | Description and significance of the problem/phenomenon studied; review of relevant theory and empirical work; problem statement                                                                                                                                                                                                          | Addressed |
| S4  | Purpose or research question                | Purpose of the study and specific objectives or questions                                                                                                                                                                                                                                                                                | Addressed |
|     | <b>Methods</b>                              |                                                                                                                                                                                                                                                                                                                                          |           |
| S5  | Qualitative approach and research paradigm  | Qualitative approach (e.g., ethnography, grounded theory, case study, phenomenology, narrative research) and guiding theory if appropriate; identifying the research paradigm (e.g., positivist, constructivist/interpretivist) is also recommended                                                                                      | Addressed |
| S6  | Researcher characteristics and reflexivity  | Researchers' characteristics that may influence the research, including personal attributes, qualifications/experience, relationship with participants, assumptions, or presuppositions; potential or actual interaction between researchers' characteristics and the research questions, approach, methods, results, or transferability | Addressed |
| S7  | Context                                     | Setting/site and salient contextual factors; rationale                                                                                                                                                                                                                                                                                   | Addressed |
| S8  | Sampling strategy                           | How and why research participants, documents, or events were selected; criteria for deciding when no further sampling was necessary (e.g., sampling saturation); rationale <sup>a</sup>                                                                                                                                                  | Addressed |
| S9  | Ethical issues pertaining to human subjects | Documentation of approval by an appropriate ethics review board and participant consent, or explanation for lack thereof; other confidentiality and data security issues                                                                                                                                                                 | Addressed |
| S10 | Data collection methods                     | Types of data collected; details of data collection procedures including (as appropriate) start and stop dates                                                                                                                                                                                                                           | Addressed |

|                                                                                                  |                                                                                                                                                                                                                                                                                                       |           |
|--------------------------------------------------------------------------------------------------|-------------------------------------------------------------------------------------------------------------------------------------------------------------------------------------------------------------------------------------------------------------------------------------------------------|-----------|
|                                                                                                  | of data collection and analysis, iterative process, triangulation of sources/methods, and modification of procedures in response to evolving study findings; rationale <sup>a</sup>                                                                                                                   |           |
| S11 Data collection instruments and technologies                                                 | Description of instruments (e.g., interview guides, questionnaires) and devices (e.g., audio recorders) used for data collection; if/how the instrument(s) changed over the course of the study                                                                                                       | Addressed |
| S12 Units of study                                                                               | Number and relevant characteristics of participants, documents, or events included in the study; level of participation (could be reported in results)                                                                                                                                                | Addressed |
| S13 Data processing                                                                              | Methods for processing data prior to and during analysis, including transcription, data entry, data management and security, verification of data integrity, data coding, and anonymization/deidentification of excerpts                                                                              | Addressed |
| S14 Data analysis                                                                                | Process by which inferences, themes, etc., were identified and developed, including researchers involved in data analysis; usually references a specific paradigm or approach; rationale <sup>a</sup>                                                                                                 | Addressed |
| S15 Techniques to enhance trustworthiness                                                        | Techniques to enhance trustworthiness and credibility of data analysis (e.g., member checking, audit trail, triangulation); rationale <sup>a</sup>                                                                                                                                                    | Addressed |
| <b>Results/Findings</b>                                                                          |                                                                                                                                                                                                                                                                                                       |           |
| S16 Synthesis and interpretation                                                                 | Main findings (e.g., interpretations, inferences, and themes); might include development of a theory or model, or integration with prior research or theory                                                                                                                                           | Addressed |
| S17 Links to empirical data                                                                      | Evidence (e.g., quotes, field notes, text excerpts, photographs) to substantiate analytic findings                                                                                                                                                                                                    | Addressed |
| <b>Discussion</b>                                                                                |                                                                                                                                                                                                                                                                                                       |           |
| S18 Integration with prior work, implications, transferability, and contribution(s) to the field | Short summary of main findings; explanation of how findings and conclusions connect to, support, elaborate on, or challenge conclusions of earlier scholarship; discussion of scope of application/generalizability; identification of unique contribution(s) to scholarship in a discipline or field | Addressed |
| S19 Limitations                                                                                  | Trustworthiness and limitations of findings                                                                                                                                                                                                                                                           | Addressed |
| <b>Other</b>                                                                                     |                                                                                                                                                                                                                                                                                                       |           |
| S20 Conflicts of interest                                                                        | Potential sources of influence or perceived influence on study conduct and conclusions; how these were managed                                                                                                                                                                                        | Addressed |
| S21 Funding                                                                                      | Sources of funding and other support; role of funders in data collection, interpretation, and reporting                                                                                                                                                                                               | Addressed |

# BMJ Open

## Leverage Points to Improve Smoking Cessation Treatment in a Large Tertiary Care Hospital: A Systems-Based Mixed Methods Study

|                                 |                                                                                                                                                                                                                                                                                                                                                                                                                                                                       |
|---------------------------------|-----------------------------------------------------------------------------------------------------------------------------------------------------------------------------------------------------------------------------------------------------------------------------------------------------------------------------------------------------------------------------------------------------------------------------------------------------------------------|
| Journal:                        | <i>BMJ Open</i>                                                                                                                                                                                                                                                                                                                                                                                                                                                       |
| Manuscript ID                   | bmjopen-2019-030066.R1                                                                                                                                                                                                                                                                                                                                                                                                                                                |
| Article Type:                   | Research                                                                                                                                                                                                                                                                                                                                                                                                                                                              |
| Date Submitted by the Author:   | 15-May-2019                                                                                                                                                                                                                                                                                                                                                                                                                                                           |
| Complete List of Authors:       | Ramsey, Alex; Washington University School of Medicine in Saint Louis, Psychiatry<br>Prentice, Donna; Barnes-Jewish Hospital, Department of Research for Patient Care Services<br>Ballard, Ellis; Washington University in Saint Louis, Brown School of Social Work and Public Health<br>Chen, Li-Shiun; Washington University School of Medicine in Saint Louis, Psychiatry<br>Bierut, Laura J.; Washington University School of Medicine in Saint Louis, Psychiatry |
| <b>Primary Subject Heading</b>: | Smoking and tobacco                                                                                                                                                                                                                                                                                                                                                                                                                                                   |
| Secondary Subject Heading:      | Health services research, Qualitative research, Research methods                                                                                                                                                                                                                                                                                                                                                                                                      |
| Keywords:                       | HEALTH SERVICES ADMINISTRATION & MANAGEMENT, Protocols & guidelines < HEALTH SERVICES ADMINISTRATION & MANAGEMENT, Quality in health care < HEALTH SERVICES ADMINISTRATION & MANAGEMENT, INTERNAL MEDICINE, PREVENTIVE MEDICINE, QUALITATIVE RESEARCH                                                                                                                                                                                                                 |
|                                 |                                                                                                                                                                                                                                                                                                                                                                                                                                                                       |

SCHOLARONE™  
Manuscripts

1  
2  
3 **Leverage Points to Improve Smoking Cessation Treatment in a Large Tertiary Care**  
4  
5 **Hospital: A Systems-Based Mixed Methods Study**  
6  
7  
8  
9

10  
11  
12 Alex T. Ramsey, Ph.D.<sup>1</sup>, Donna Prentice, Ph.D., R.N.<sup>2</sup>, Ellis Ballard, M.S.W., M.P.H.<sup>3</sup>, Li-Shiun  
13  
14 Chen, M.D., M.P.H., Sc.D.<sup>1</sup>, Laura J. Bierut, M.D.<sup>1</sup>  
15  
16

17  
18  
19 <sup>1</sup>Department of Psychiatry, Washington University School of Medicine, St. Louis, MO, USA  
20

21 <sup>2</sup>Department of Research for Patient Care Services, Barnes-Jewish Hospital, St. Louis, MO, USA  
22

23 <sup>3</sup>Brown School of Social Work and Public Health, Washington University, St. Louis, MO, USA  
24  
25

26  
27  
28 Corresponding Author:  
29

30  
31 Alex T. Ramsey, Ph.D.  
32 Department of Psychiatry  
33 Washington University School of Medicine  
34 660 South Euclid  
35 St. Louis, MO 63110, USA  
36 Phone: (314) 362-5370  
37 Email: aramsey@wustl.edu  
38  
39  
40  
41  
42  
43  
44  
45  
46  
47  
48  
49  
50  
51  
52  
53  
54  
55  
56  
57  
58  
59  
60

## ABSTRACT

**Objectives:** To generate system insights on patient and provider levers and strategies that must be activated to improve hospital-based smoking cessation treatment.

**Design:** Mixed methods study including a series of in-depth group model building sessions, which informed the design of an online survey completed by healthcare providers and a structured interview protocol administered at the bedside to patients who smoke.

**Setting:** Large, tertiary care hospital in the Midwestern United States.

**Participants:** *Group model building:* 28 healthcare providers and 22 previously-hospitalized patients; *Online survey:* 308 healthcare providers; *Bedside interviews:* 205 hospitalized patients.

**Primary and Secondary Outcome Measures:** Hypothesis-generating, participatory qualitative methods informed the examination of the following quantitative outcomes: patient interest versus provider perception of patient interest in smoking cessation and treatment; patient-reported receipt versus provider-reported offering of inpatient smoking cessation interventions; and priority ratings of importance and feasibility of strategies to improve treatment.

**Results:** *System insights* included patients frequently leaving the floor to smoke, which created major workflow disruption. *Leverage points* included interventions to reduce withdrawal symptoms, and *action ideas* included nurse-driven protocols for timely administration of nicotine replacement therapy. Quantitative data corroborated system insights; for instance, 80% of providers reported that patients frequently leave the floor to smoke, leading to safety risks, missed assessments, and inefficient use of staff time. Patients reported significantly lower rates of receiving any smoking cessation interventions, as compared to provider reports (mean diff=17.4%-33.7%,  $p<.001$ ). Although 92% of providers cited patient interest as a key barrier, only 4% of patients indicated no interest in quitting or reducing smoking.

1  
2  
3 **Conclusions:** Engaging hospital providers and patients in participatory approaches to develop an  
4 implementation strategy revealed discrepant perceptions of patient interest and frequency of  
5 hospital-based treatment for smoking. These findings spurred adoption of standardized point-of-  
6 care treatment for cigarette smoking, which remains highly prevalent yet undertreated among  
7 hospitalized patients.  
8  
9  
10  
11  
12  
13  
14  
15  
16

### 17 **STRENGTHS AND LIMITATIONS**

- 19 • Using a systems science lens, this study integrated multiple data sources to inform more  
20 systematic provision of smoking cessation treatment practices in hospital settings.  
21
- 22 • This study featured a rigorous mixed methods approach whereby hypothesis-generating  
23 qualitative data informed the design of quantitative instruments and guided interpretation  
24 of resulting quantitative data.  
25
- 26 • The use of participatory approaches to engage healthcare provider and patient  
27 stakeholders identified provider and patient levers to be activated in a robust  
28 implementation strategy.  
29
- 30 • Despite having many similarities to other healthcare systems in the nation, study findings  
31 are based in one large tertiary care hospital system in the Midwestern United States.  
32  
33  
34  
35  
36  
37  
38  
39  
40  
41  
42  
43  
44  
45  
46  
47  
48  
49  
50  
51  
52  
53  
54  
55  
56  
57  
58  
59



## INTRODUCTION

Cigarette smoking remains the leading cause of preventable death worldwide.(1–4) National efforts directed at reducing tobacco use have contributed to a decline in the proportion of combustible cigarette smokers.(5,6) However, smoking prevalence among those entering hospital settings remains much higher than in the general population, as those with chronic conditions have higher prevalence of smoking.(7,8) Hospital settings therefore present an opportune time to promote cessation.(9,10)

Despite the existence of effective, FDA-approved medications for smoking cessation—including nicotine replacement therapy, varenicline, and bupropion(11–13)—which can be combined with brief counseling for optimal success,(14) these treatments remain underutilized in inpatient settings.(15–17) In our hospital, only 18-24% of patients who smoke received smoking cessation pharmacotherapy during hospitalization from 2010 to 2016.(8) Further, these medications were often prescribed inconsistently between admitting services and sub-demographic groups in our hospital. For instance, African Americans were 35% less likely than European Americans to receive smoking cessation pharmacotherapies during their hospital stay, which highlights concerning inequalities in hospital prescribing practices.(8) Similar patterns were found in a study of smoking cessation pharmacotherapy rates among smokers hospitalized for an acute cardiac condition across 282 U.S. hospitals; the median treatment rate was 22.3% and even lower among minority racial/ethnic groups.(17) Treatment rates across these hospitals were also highly variable, suggesting that hospitals may be using, with varying levels of success, different strategies to implement inpatient smoking cessation treatment programs.

These treatment gaps and disparities indicate suboptimal care, as inpatient smoking cessation pharmacotherapy in combination with post-discharge treatment has been shown in

1  
2  
3 meta-analyses to improve quit rates and is now considered the standard of care by Joint  
4  
5 Commission.(10,15) Nevertheless, these treatment gaps and disparities signal that the  
6  
7 implementation of smoking cessation treatment approaches remains a formidable challenge in  
8  
9 hospital settings. Currently, it is not clear which patient and provider levers and strategies must  
10  
11 be activated to improve smoking cessation treatment in hospital settings. Additionally, there is  
12  
13 inadequate guidance on the best system-level implementation strategies to use to improve  
14  
15 treatment delivery for hospitalized patients who smoke. The healthcare system requires  
16  
17 pragmatic evidence to increase the likelihood that other hospitals use strategies that were  
18  
19 robustly supported by rigorous yet relevant data and decrease the likelihood that hospitals use  
20  
21 strategies without robust support. However, obtaining pragmatic, rigorous, and relevant data may  
22  
23 require novel uses of methods including more participatory, stakeholder-engaged approaches that  
24  
25 integrate diverse types of data to gain a better understanding of the system-level gaps in care,  
26  
27 high-leverage target areas to focus change efforts, and specific strategies that can improve the  
28  
29 treatment of patients who smoke. This study uses a systems science lens that integrates multiple  
30  
31 data sources to inform more systematic provision of smoking cessation treatment practices in  
32  
33 hospital settings, thereby using a novel approach to address a thorny problem that has challenged  
34  
35 healthcare systems for decades.

### 42 **Study purpose**

44 The goal of the study was to understand determinants of the treatment gap in hospitalized  
45  
46 patients who smoke and inform the development of stakeholder-supported strategies for  
47  
48 improving smoking cessation treatment delivery in the inpatient setting. Building on our robust,  
49  
50 validated electronic health record data demonstrating suboptimal smoking cessation  
51  
52 pharmacotherapy prescription practices,(8) this study integrated multiple data sources to inform  
53  
54  
55  
56  
57  
58  
59  
60

1  
2  
3 more systematic provision of smoking cessation treatment practices in hospital settings. To our  
4  
5 knowledge, this is the only study to engage with hospital patients and providers in a participatory  
6  
7 process to identify the underlying system structure producing the treatment gap, collateral effects  
8  
9 of this gap (e.g., impacts on provider workflow), optimal leverage points, and actionable  
10  
11 strategies to yield consistent delivery of smoking cessation care in hospital settings.(18–21)  
12  
13

## 14 15 **METHODS**

16  
17 This mixed methods study integrated qualitative and quantitative data sources including  
18  
19 in-depth group model building sessions with healthcare providers and patients,(21,22) followed  
20  
21 by an online survey with healthcare providers and bedside interviews with patients.  
22  
23

### 24 **Phase I: Group model building with healthcare providers and patients (qualitative work)**

#### 25 26 *Participants and procedures*

27  
28 Participants were recruited from Barnes-Jewish Hospital (BJH), a large tertiary care  
29  
30 hospital. We engaged two participant populations: (1) BJH employees including physicians,  
31  
32 nurses, and support staff with patient contact and (2) patients who had recently received care at  
33  
34 BJH and who self-identified as current smokers at the time of their most recent hospital  
35  
36 admission. To recruit healthcare providers, we requested program directors and nursing  
37  
38 supervisors of a diverse set of service lines—including general surgery, internal medicine,  
39  
40 neurology, oncology, orthopedics, otolaryngology, and psychiatry—to distribute recruitment  
41  
42 materials to employees who may be eligible to participate. We excluded participants from the  
43  
44 intensive care unit, emergency room, and operating room due to lower relevance of the topic in  
45  
46 these acute care settings. We also prioritized our active recruitment efforts within service lines  
47  
48 likely to find the topic most relevant for their service delivery; therefore, some hospital services  
49  
50 (e.g., plastic surgery, urology) fell outside the scope of our recruitment efforts. To recruit  
51  
52  
53  
54  
55  
56  
57  
58  
59  
60

1  
2  
3 patients who had been previously hospitalized at BJH, we distributed a recruitment email  
4  
5 through a research participant registry to potentially eligible individuals who smoke, posted a  
6  
7 Facebook advertisement on the registry fan page listing, and hung printed flyers in the hospital.  
8  
9 Those interested in participating were screened using a standardized telephone script.  
10  
11

12 We engaged 50 stakeholders in five group model building sessions comprised of patients  
13  
14 (2 sessions, n=22), nurses, social workers, and case managers (1 session, n=14), nurse  
15  
16 practitioners, hospitalists, and pharmacists (1 session, n=6), and resident physicians (1 session,  
17  
18 n=8). Using a standard process for synthesizing the models,(22–24) we then invited all  
19  
20 participants in the initial sessions to reconvene for a model review that functioned to present a  
21  
22 preliminary synthesis model for critique and refinement of the stakeholder-generated model (1  
23  
24 session, n=16). Patients and providers stemmed from a wide variety of hospital service lines,  
25  
26 including cardiology, general surgery, internal medicine, neurology, obstetrics, oncology,  
27  
28 orthopedics, otolaryngology, and psychiatry. We received participation from each service line  
29  
30 from which we recruited. Sessions were conducted between late October 2017 and early  
31  
32 February 2018.  
33  
34  
35  
36

37 Planning, conduct, and analysis of the series of sessions was led by a Core Modeling  
38  
39 Team, including the principal investigator, BJH nursing partner, and two experts in group model  
40  
41 building and community-based system dynamics. Each group model building session utilized a  
42  
43 Facilitation Team, which included the *conveners/closers* (principal investigator and nursing  
44  
45 partner), *primary modeler* (lead expert in group model building), *facilitators* (~2 support experts  
46  
47 in group model building), and *note takers* (~2 additional team members). The group model  
48  
49 building team used scripts,(23) or a pre-defined set of exercises and behaviors, to provide a semi-  
50  
51 structured environment for (1) patient stakeholder groups to model a typical sequence of clinical  
52  
53  
54  
55  
56  
57  
58  
59  
60

1  
2  
3 encounters that may or may not result in patients being offered smoking cessation treatment and  
4  
5 (2) healthcare provider stakeholder groups to model a typical sequence of clinical decision points  
6  
7 with regard to ordering and administering smoking cessation treatment and offering counseling  
8  
9 in the hospital. Patient participants were then asked to identify factors that determine the  
10  
11 likelihood of being offered and receiving smoking cessation treatment. Similarly, healthcare  
12  
13 provider participants were asked to identify factors that determine the likelihood of offering  
14  
15 smoking cessation pharmacotherapy and counseling, the likelihood of patients accepting  
16  
17 pharmacotherapy and counseling, sources of decision-making, and workflow barriers. All  
18  
19 participants were then asked to prioritize the identified factors and position them as intervening  
20  
21 variables within the modeled sequence of events.  
22  
23  
24

#### 25 26 *Mixed methods analytic approach*

27  
28 We used an exploratory sequential design in which qualitative data from the group model  
29  
30 building sessions informed the design of the quantitative online survey and patient bedside  
31  
32 interviews.<sup>(25)</sup> The qualitative data were hypothesis-generating to further guide the development  
33  
34 of the quantitative measures and interpretation of the resulting quantitative data.  
35  
36

### 37 **Phase II: Online survey with healthcare providers (quantitative and qualitative)**

#### 38 39 *Participants and procedures*

40  
41 We recruited healthcare providers to complete an anonymous 10 minute online survey by  
42  
43 emailing a cover letter and survey link to administrative contact persons, program directors, and  
44  
45 nursing staff who then distributed the email through their networks. Participants of the online  
46  
47 survey included 308 providers (112 physicians, 196 nurses) from BJH with direct inpatient  
48  
49 contact. Participants were located across a wide range of service lines, with internal medicine  
50  
51 (46%) and general surgery (22%) being the most highly represented. As in Phase I, we excluded  
52  
53  
54  
55  
56  
57  
58  
59  
60

1  
2  
3 participants from the intensive care unit, emergency room, and operating room due to lower  
4  
5 relevance of the topic in these acute care settings. Of physicians, 79% were resident physicians,  
6  
7 and 21% were hospitalists. Of nurses, 47% were staff nurses, 30% nurse practitioners, and 23%  
8  
9 other types of nurses. Nurses and physicians were asked via quantitative assessments about their  
10  
11 current smoking cessation treatment practices—namely the use of the “5A’s”: *Ask* about tobacco  
12  
13 use, *Advise* to quit smoking, *Assess* readiness for quit attempt, *Assist* with medication and  
14  
15 counseling options, and *Arrange* follow-up contact or referral,(26–28) barriers to using these  
16  
17 practices, perceived patient interest in various smoking cessation resources during an inpatient  
18  
19 stay, perceived importance and feasibility of various potential strategies to improve practices,  
20  
21 and the frequency of workflow and safety issues related to hospitalized patient smoking.  
22  
23  
24  
25  
26 Qualitative data were obtained through an open-ended prompt to share “final thoughts or  
27  
28 comments on the topic of smoking cessation treatment at BJH.” The online survey remained  
29  
30 open from late February 2018 to late March 2018.  
31  
32

### 33 **Phase III: Bedside interviews with patients (quantitative)**

#### 34 *Participants and procedures*

35  
36  
37 We recruited hospitalized patients to complete a structured 5-minute interview at the  
38  
39 bedside. Whereas patients in Phase I were recruited subsequent to their hospitalization as  
40  
41 necessary for convening the group model building sessions, patients recruited in Phase III for the  
42  
43 brief individualized interviews were still hospitalized yet nearing discharge. This facilitated  
44  
45 accurate recall of events while minimizing the risk of missing patients who had recently been  
46  
47 discharged or delaying patients’ ability to exit the hospital once discharged. We obtained reports  
48  
49 daily during the month of May 2018 from the hospital electronic health record to identify  
50  
51 potentially eligible patients and conducted all interviews during this time period. Participants of  
52  
53  
54  
55  
56  
57  
58  
59  
60

1  
2  
3 the bedside interviews included 205 inpatients who were categorized by electronic health record  
4 as current smokers and nearing hospital discharge. Participants were more often male (56%) and  
5  
6 Caucasian (59%), with a median age of 54 ( $M=50.25$ ;  $SD=15.22$ ). These demographics appeared  
7  
8 to be very similar to those of the larger population of BJH patients across the hospital who were  
9  
10 current smokers during this time frame (May 2018). On average, participants smoked 14.0  
11  
12 cigarettes per day and had stayed in the hospital for 4.5 days within a variety of admitting  
13  
14 services, including internal medicine (38%), surgery (23%), oncology (13%), cardiology (12%),  
15  
16 neurology (7%), and orthopedics (5%). Based on an existing questionnaire to compare patient  
17  
18 and provider reports in a different context,(26) patients were asked about their smoking  
19  
20 behaviors (i.e., verification of current smoker status prior to hospital admission, cigarettes per  
21  
22 day, frequency of leaving the floor to smoke); ever and current e-cigarette use; smoking  
23  
24 cessation care they had received during their current inpatient stay (i.e., receipt of the 5A's: *ask*,  
25  
26 *advise*, *assess*, *assist*, *arrange*); interest in quitting smoking now, quitting smoking later,  
27  
28 smoking less, and methods to quit smoking (e.g., medications); number of past year quit  
29  
30 attempts; and the importance of various potential strategies to improve practices (e.g., offering  
31  
32 medication to every patient who smokes).

### 33 34 35 36 37 38 39 40 *Statistical analysis approach*

41  
42 Data from the healthcare provider online surveys and patient bedside interviews were  
43  
44 first analyzed descriptively via frequencies and means. Patient-reported receipt of 5A's smoking  
45  
46 cessation practices were examined in relation to provider reports using summary independent-  
47  
48 sample t-test analyses. Multiple linear analyses were conducted to determine associations  
49  
50 between medication receipt and the likelihood and frequency of leaving the floor to smoke,  
51  
52  
53  
54  
55  
56  
57  
58  
59  
60

1  
2  
3 controlling for cigarettes per day and length of stay. Missing data across variables were minimal  
4  
5 (< 2% for healthcare providers and <3% for patients) and handled via pairwise deletion.  
6

## 7 **Patient and public involvement**

8  
9  
10 During participant recruitment, patients were able to identify other potentially eligible  
11  
12 individuals who smoke to be screened for enrollment. Through the participatory group model  
13  
14 building sessions, patients generated key system insights that informed the research questions  
15  
16 and outcome measures to be assessed in the subsequent online survey for healthcare providers  
17  
18 and bedside interview protocol for patients. For instance, patients expressed significant  
19  
20 frustration regarding being asked repeatedly about their smoking behaviors without being offered  
21  
22 any help to quit smoking during their hospital stay. As a result, the research team prioritized  
23  
24 questions in the quantitative instruments to assess the frequency of patient- and provider-reported  
25  
26 delivery of smoking cessation interventions, as well as patient and provider reports of patient  
27  
28 interest in receiving smoking cessation treatment while hospitalized. This research reflects a key  
29  
30 step in developing a system-level intervention; therefore, patient input is contributory to ongoing  
31  
32 research and practice improvements. We plan to disseminate results of this study to patients and  
33  
34 other participants by presenting findings at local symposia and conferences that are well attended  
35  
36 by patients, patient advocates, healthcare providers, and the broader community. We will also  
37  
38 present these findings during healthcare provider training workshops, whereby patients benefit  
39  
40 through improved quality of smoking cessation care in the hospital.  
41  
42  
43  
44  
45

## 46 **RESULTS**

### 47 **Phase I: Group model building**

48  
49  
50  
51 *System insights – “What factors determine the likelihood that patient smoking will be treated?”*  
52

53  
54 Based on factors prioritized by participants during group model building, the research  
55  
56  
57  
58  
59  
60



1  
2  
3 team generated a multilevel (i.e., individual, hospital, community, policy) understanding,  
4 referred to as system insights, that characterized the observed undertreatment of patients who  
5 smoke. Supplemental File 1 illustrates the intentionally oversimplified backbone structure to  
6 which participants were responding and building on with content and context. These insights  
7 included *provider* reports of patients frequently leaving the floor to smoke, which created major  
8 workflow problems and enhanced provider receptivity to solutions framed to address “nicotine  
9 withdrawal” rather than “cessation”. A commonly reported scenario involved untreated hospital  
10 patients going outside to smoke, leading to missed assessments or procedures, which then  
11 prompted nurses to prioritize smoking cessation medications to prevent further workflow  
12 disruptions. *Providers* also reported a lack of awareness of resources, and enthusiasm balanced  
13 with concerns about time, while *patients* reported infrequent receipt of smoking cessation  
14 support and preferences for non-judgmental communication (see Table 1).  
15  
16  
17  
18  
19  
20  
21  
22  
23  
24  
25  
26  
27  
28  
29

30  
31 *Potential leverage points – “What targets could lead to major system-level improvements?”*  
32

33 With these system insights providing the appropriate frame, the modeling group then  
34 identified potential leverage points to target for action. Leverage points refer to places within a  
35 complex system in which a small change can produce large changes in the overall system  
36 behavior.(29) Potential leverage points to address provider-reported insights included  
37 interventions framed as solutions to reduce nicotine withdrawal and subsequent workflow  
38 problems, education and decision support, and a standardized approach to smoking cessation  
39 treatment. Potential leverage points to address patient-reported insights included transparency of  
40 patient interest and use of treatment and patient-provider rapport through more supportive  
41 cessation messaging (see Table 1).  
42  
43  
44  
45  
46  
47  
48  
49  
50  
51  
52

53  
54 *Action ideas – “Which specific strategies appear both highly important and feasible?”*  
55  
56  
57  
58  
59  
60

1  
2  
3 Finally, stakeholders used these potential leverage points as the frame for nominating  
4 potential concrete solutions and then prioritizing them on perceived importance and feasibility in  
5 the hospital setting. Providers generated action ideas to address their own provider-reported  
6 insights and leverage points, including implementing nurse-driven protocols for timely  
7 administration of inpatient nicotine replacement therapy, using an assortment of provider training  
8 approaches, designing electronic health records to support point-of-care decisions, and offering  
9 point-of-care advice, medication, and links to outpatient counseling. Patients generated action  
10 ideas to address their own patient-reported insights and leverage points, including creating  
11 provider feedback systems, developing cessation plans for discharge, offering help to every  
12 patient who smokes, and revamping hospital signage for more positive messaging (see Table 1).  
13  
14 These system insights, potential leverage points, and action ideas were then examined more  
15 closely in the subsequent online survey with providers and bedside interviews with patients.  
16  
17  
18  
19  
20  
21  
22  
23  
24  
25  
26  
27  
28  
29  
30  
31  
32  
33  
34  
35  
36  
37  
38  
39  
40  
41  
42  
43  
44  
45  
46  
47  
48  
49  
50  
51  
52  
53  
54  
55  
56  
57  
58  
59  
60

**Table 1. Linking stakeholder-generated system insights with potential leverage points and action ideas**

| Viewpoint | System Insights                                                                                                                                                                                  | Potential Leverage Points                                                                                                                         | Action Ideas                                                                                                                                                                                                                                                      | Representative Quote                                                                                                                                                                                                                                                                           |
|-----------|--------------------------------------------------------------------------------------------------------------------------------------------------------------------------------------------------|---------------------------------------------------------------------------------------------------------------------------------------------------|-------------------------------------------------------------------------------------------------------------------------------------------------------------------------------------------------------------------------------------------------------------------|------------------------------------------------------------------------------------------------------------------------------------------------------------------------------------------------------------------------------------------------------------------------------------------------|
| Provider  | Patients frequently leave the floor to smoke, which creates major workflow problems; as a result, providers are more compelled by “reducing nicotine withdrawal” rather than “cessation” efforts | Interventions to reduce nicotine withdrawal symptoms and framing solutions around nicotine replacement and workflow to foster provider engagement | Use nurse-driven protocols to ensure that readily accessible nicotine replacement therapy can be provided to inpatients with little delay                                                                                                                         | <i>“People go down to smoke and they miss meds and even appointments which is so frustrating.”</i><br>– [Staff nurse]                                                                                                                                                                          |
| Provider  | Providers lack awareness of existing cessation resources to connect patients at discharge, which negatively impacts their willingness to provide inpatient smoking cessation care                | Education and decision support                                                                                                                    | Use continuing medical education, roving in-services, quick reference tools, and brief videos to train providers on how to implement existing and effective treatments<br><br>Design electronic health record modules to support point-of-care treatment decision | <i>“I would like to know more about free or low-cost smoking cessation treatment centers to which I can refer my patients...if there was some way they could get [medications] at low cost along with smoking cessation therapy, I think that would be beneficial.”</i> – [Resident physician] |
| Provider  | Enthusiasm to improve inpatient smoking cessation is balanced by concern about demands and limited time                                                                                          | Standardized and coordinated approach to smoking cessation treatment                                                                              | Provide point-of-care brief advice, opt-out medication, and discharge links to community resources, including quit-line counseling, to every patient who smokes                                                                                                   | <i>“Most of us would love to help them quit smoking, but it is time consuming...thereby making it feel very much like extra work and easily dropped when busy.”</i> – [Resident physician]                                                                                                     |
| Patient   | Patients are often asked about their smoking but very rarely assisted with cessation                                                                                                             | Transparency regarding patient interest in and use of treatment                                                                                   | Give providers feedback on individual and aggregate rates of offering smoking cessation treatment, as well as patient interest and engagement with cessation support<br><br>Develop cessation plan for discharge                                                  | <i>“I’m so tired of being asked if I’m a smoker without being offered help to quit. It seems like they are only asking so that they can check a box and move on.”</i> – [Patient]                                                                                                              |
| Patient   | Patients are more compelled by positive and non-judgmental communication                                                                                                                         | Patient-provider rapport through more supportive cessation messaging                                                                              | Ask every patient who smokes if they would like help to quit smoking<br><br>Revamp hospital signage to incorporate positive messaging on smoking cessation                                                                                                        | <i>“The more respect staff gives, the more honest the conversation is, and the more likely I will be to accept treatment.”</i> – [Patient]                                                                                                                                                     |

## Phase II: Healthcare provider online survey

### *Qualitative data*

Open-ended responses from the provider sample were useful in expanding further upon the group model building data. Key representative quotes are included in Table 1 to reinforce themes from the group model building sessions.

### *Quantitative data*

Rates of smoking cessation practice varied substantially across the 5A's, with the majority of providers indicating regular completion of *Ask* (88%), *Advise* (79%), *Assess* (62%), and *Assist* (63%), with lower rates for *Arrange* (24%). Additionally, 64% of providers reported that they often-to-always encourage use of medication (e.g., nicotine replacement therapy, varenicline) with patients for smoking cessation.

The most commonly cited barriers to providing treatment were patient lack of interest (92%) and compliance (92%), followed by lack of awareness of existing community resources for patient referral (72%) and lack of time (71%).

Approximately 80% of providers reported that patients often or very often leave the floor to smoke and that this frequently leads to patients posing a safety risk (75% reported often or very often), assessments being missed (51% reported often or very often), and staff time used to escort patients off the floor (42% reported often or very often).

The strategies rated as most important for improving smoking cessation treatment at the hospital were also the ones rated as most feasible. These top strategies included asking every patient who smokes if they want help (86% endorsed as very or extremely important; 77% endorsed as very or extremely feasible), offering brief advice to every patient who smokes (65% endorsed as very or extremely important; 56% endorsed as very or extremely feasible), and

offering medication to every patient who smokes (62% endorsed as very or extremely important; 52% endorsed as very or extremely feasible).

### Phase III: Patient bedside interviews

Table 2 highlights high levels of patient smoking cessation interest and attempts. In particular, nearly three-fourths (73%) were interested in quitting now, and nearly all (96%) were interested in quitting or smoking less. Most patients (59%) had tried quitting in the past year. Nearly two-thirds (65%) had ever used e-cigarettes, and 12% currently used them.

**Table 2. High patient demand to quit smoking**

| Variables                                           | Patients No. (%) |
|-----------------------------------------------------|------------------|
| Interested in quitting now                          | 146/200 (73)     |
| Interested in quitting now or later                 | 188/202 (93)     |
| Interested in quitting now or later or smoking less | 193/202 (96)     |
| Past year quit attempt                              | 118/201 (59)     |
| Ever used e-cigarettes                              | 131/202 (65)     |
| Currently used e-cigarettes                         | 25/202 (12)      |

Regarding comparisons between patient and provider reports of the 5A's, patients reported rates similar to providers on *Ask* (mean diff= -1.4%;  $p=0.653$ ); however, they reported much lower rates of receiving *Advise* (mean diff= -27.5%;  $p<.001$ ), *Assess* (mean diff= -33.7%;  $p<.001$ ), *Assist* (mean diff= -19.2%;  $p<.001$ ), and *Arrange* (mean diff= -17.4%;  $p<.001$ ) steps (see Figure 1), as well as being provided with medication to quit smoking during their inpatient stay (mean diff= -35.0%;  $p<.001$ ; see Figure 2). Additionally, in contrast to 92% of providers citing patient interest as a key barrier to smoking cessation treatment, only 4% of patients indicated no interest in quitting at some point or smoking less, and only 27% of patients indicated no interest in quitting now.

1  
2  
3 Nearly one-third (31%) of patients reported that they had left the floor to go smoke  
4 during their hospital stay, and nearly two-thirds of those who left did so multiple times per day.  
5 Overall, receipt of inpatient smoking cessation medication was not significantly associated with  
6 leaving the floor to smoke ( $p=.331$ ). However, among patients who left, those who did not  
7 receive smoking cessation medications were more likely to report leaving multiple times per day  
8 than those who received medications, controlling for cigarettes per day and length of stay  
9 (OR=3.3,  $p=.036$ ).  
10  
11  
12  
13  
14  
15  
16  
17  
18

19 Patients were well-aligned with providers regarding perceived importance of potential  
20 strategies to improve smoking cessation treatment in the hospital (see Figure 3). The most highly  
21 rated strategies were to ask every patient who smokes if they want help (76% endorsed as very or  
22 extremely important), offer medication to every patient who smokes (67%), and offer brief  
23 advice to every patient who smokes (58%).  
24  
25  
26  
27  
28  
29

## 30 **DISCUSSION**

31  
32  
33 Extensive research has examined the hospital as a prime setting to engage patients in  
34 smoking cessation treatment, as well as effective treatment approaches to employ in hospital  
35 settings,(9–14) yet persistent treatment gaps signal formidable implementation challenges.(15–  
36 17) This study uniquely employed a systems science lens to frame the implementation challenges  
37 and opportunities using a rigorous mixed methods approach to generate system insights,  
38 potential leverage points, and specific strategies to improve the treatment of hospitalized patients  
39 who smoke. Key contributions of this research include 1) detailing an underutilized participatory,  
40 stakeholder-engaged process to yield hypothesis-generating qualitative data that informed the  
41 design and interpretation of quantitative data, and 2) a robust set of provider and patient levers to  
42 be activated in a multi-component implementation strategy in future research.  
43  
44  
45  
46  
47  
48  
49  
50  
51  
52  
53  
54  
55  
56  
57  
58  
59  
60

1  
2  
3 Healthcare providers reported that patient smoking during a hospitalization created  
4  
5 significant workflow issues for hospital staff. Despite low current rates of smoking cessation  
6  
7 pharmacotherapy prescribing, we found high patient demand to quit smoking. Provider-reported  
8  
9 barriers centered on a perceived lack of patient interest, time, and awareness of existing  
10  
11 resources; these barriers reflect aspects of motivation, opportunity, and capability, which have  
12  
13 been identified as key determinants of behavioral change and fruitful targets for  
14  
15 intervention.(30,31)  
16  
17  
18

19  
20 Despite the wealth of research on inpatient smoking and hospital-based cessation  
21  
22 treatment, far fewer studies have focused on potential collateral effects of inpatient smoking and  
23  
24 treatment gaps, such as impeded provider workflow characterized by missed assessments and  
25  
26 procedures, misuse of staff time, and potential safety concerns, as found in the current study.  
27  
28 Importantly, providers were much more receptive to and compelled by approaches to prevent the  
29  
30 chain of events involving nicotine withdrawal, patients leaving the floor to smoke, and workflow  
31  
32 problems, as opposed to approaches framed as promoting smoking cessation among hospitalized  
33  
34 patients. This finding has significant implications for approaches to engaging hospital providers  
35  
36 in the treatment of inpatients who smoke.  
37  
38  
39

40  
41 Whereas previous research found that nearly 1 in 5 smokers admitted to a hospital  
42  
43 smoked cigarettes during their hospital stay,(32) the rate was nearly 1 in 3 among smokers  
44  
45 sampled in our hospital setting. Interestingly, based on patient reports, receipt of nicotine  
46  
47 replacement therapy was not associated with whether or not patients left the floor to smoke at  
48  
49 least once; however, patients receiving nicotine replacement therapy were more likely to have  
50  
51 only left the floor to smoke once. Therefore, it is possible that patients may have been receiving  
52  
53 nicotine replacement therapy *in response to* leaving the floor to smoke (e.g., missing patient  
54  
55  
56  
57  
58  
59  
60

1  
2  
3 prompts the provider to offer treatment for nicotine withdrawal), thereby reducing the likelihood  
4  
5 that patients subsequently left due to nicotine withdrawal during their hospital stay. This  
6  
7 hypothesis would require further testing, including an establishment of temporal precedence, to  
8  
9 demonstrate risk of patient smoking before and after receiving nicotine replacement therapy in  
10  
11 the hospital setting.  
12  
13

14  
15       Regarding points of (mis)alignment between patient and provider perceptions, both  
16  
17 groups reported high rates of asking patients whether or not they smoke. However, patients  
18  
19 reported much lower rates of receiving any smoking cessation support and much higher levels of  
20  
21 interest in cessation, as compared to provider reports. This finding replicates recent research in  
22  
23 mental health settings,(26) and was corroborated by qualitative data, which characterized the  
24  
25 patient perception that providers frequently ask about smoking behaviors yet no actions result  
26  
27 from these inquiries. Improved alignment of perceptions could benefit patient-provider rapport  
28  
29 and increase acceptance of smoking cessation treatments when offered—opportunities which  
30  
31 were all raised by patients during group model building discussions.  
32  
33

34  
35       Finally, patients and providers agreed that the most important strategies were to ask every  
36  
37 patient who smokes if they want help and offer medication and brief advice to every patient who  
38  
39 smokes. Providers also found these to be the most feasible potential strategies, despite the patient  
40  
41 reports that these were not frequently occurring. While seen as feasible, providers may perceive  
42  
43 the need for a hospital-wide program that expects, supports, and reinforces the practice of  
44  
45 offering treatment to every patient who smokes. As noted in a recent systematic review,(31)  
46  
47 standardized implementation of this type of opt-out program that leverages lighter-touch point-  
48  
49 of-care support may in fact ease provider burden and workflow. In addition, the alignment  
50  
51  
52  
53  
54  
55  
56  
57  
58  
59  
60



1  
2  
3 between patients and providers in ratings of importance and feasibility give additional credence  
4 to the viability of implementing these proposed strategies in hospital settings.  
5  
6

7  
8 Limitations of this study include being based in one large tertiary care hospital system in  
9 the Midwestern United States. However, there are indications that this hospital system is largely  
10 representative of other systems in the nation. For instance, researchers recently found smoking  
11 cessation medication rates of 22.3% across 282 U.S. hospitals,(17) nearly identical to our rate of  
12 approximately 22% across years 2010-2016. In addition, patient recruitment for the group model  
13 building sessions was limited to a research participant registry; as a pool of patients who are  
14 willing to be contacted about research studies, participants from this registry may differ  
15 somewhat from patients at-large. For the online survey, the link was distributed by the primary  
16 contacts of hospital divisions, and it was not possible to determine how many healthcare  
17 providers received the opportunity to complete the survey. As a result, we were unable to  
18 ascertain response rate and therefore cannot rule out the possibility of sampling bias. Finally,  
19 patients and providers from psychiatric services may have different perceptions about smoking  
20 cessation treatment as compared to other patient and provider groups. However, only two  
21 participants from psychiatry were included in the exploratory phase of our study (Phase I) and no  
22 participants from psychiatry were included in Phases II and III in which we compared provider  
23 and patient reports of treatment (i.e., 5A's) offering and receipt.  
24  
25  
26  
27  
28  
29  
30  
31  
32  
33  
34  
35  
36  
37  
38  
39  
40  
41  
42  
43

#### 44 **CONCLUSION**

45  
46  
47 Our findings have led our hospital to adopt standardized, lighter-touch yet higher-reach  
48 approaches to smoking cessation treatment, supported by provider feedback and simplified  
49 decision support and enabled through the electronic health record system.(9,20,33,34) Prior  
50 reviews and studies frequently highlight the importance of directly targeting hospital systems,  
51  
52  
53  
54  
55  
56  
57  
58  
59  
60

1  
2  
3 including integrating key performance indicators into electronic health records, to improve the  
4 delivery of hospital smoking cessation care and the sustainability of those improvements.(35)  
5  
6  
7 Despite the local system changes, the primary contribution of these findings is in providing  
8 generalizable evidence to help other researchers, providers, and hospital administrators to  
9  
10  
11  
12  
13  
14  
15  
16  
17  
18  
19  
20  
21  
22  
23  
24  
25  
26  
27  
28  
29  
30  
31  
32  
33  
34  
35  
36  
37  
38  
39  
40  
41  
42  
43  
44  
45  
46  
47  
48  
49  
50  
51  
52  
53  
54  
55  
56  
57  
58  
59  
60

including integrating key performance indicators into electronic health records, to improve the delivery of hospital smoking cessation care and the sustainability of those improvements.(35)

Despite the local system changes, the primary contribution of these findings is in providing generalizable evidence to help other researchers, providers, and hospital administrators to prioritize the use of implementation strategies that were robustly supported across each phase of our mixed methods study. The potential leverage points we identified point to the following specific strategies:

1. *Create a standardized and coordinated approach to smoking cessation treatment:*  
Provide point-of-care brief advice, opt-out medication, and discharge links to community resources, including quit-line counseling, to every patient who smokes;
2. *Foster provider engagement by identifying and framing interventions as solutions to reduce nicotine withdrawal and subsequent workflow problems related to patients leaving the floor to smoke:* Use nurse-driven protocols to ensure that readily accessible nicotine replacement therapy can be provided to inpatients with little delay;
3. *Offer positive, supportive, and non-judgmental messaging to patients:* Revamp hospital signage to incorporate positive messaging on smoking cessation and focus on boosting confidence and motivation to quit in patients who smoke;(36)
4. *Improve awareness, knowledge, self-efficacy, and attitudes:* Use continuing medical education, roving in-services, and quick reference tools to train providers on existing and effective treatments and how to implement them;
5. *Increase transparency regarding patient interest in and use of treatment:* Give providers feedback on ongoing performance and aggregate rates of patient-reported readiness to quit and engagement with quit-line counseling to foster awareness and accountability.

1  
2  
3 Engaging hospital stakeholders through a process of self-identification of approaches to  
4 addressable problems presents opportunities to fit high-leverage challenges with sustainable,  
5 contextually-appropriate solutions. Findings from this study inform engagement with healthcare  
6 provider and patient stakeholders in the development and implementation of proposed strategies  
7 to facilitate consistent delivery of smoking cessation treatment practices in the hospital setting.  
8  
9  
10  
11  
12  
13  
14  
15  
16  
17  
18

## 19 **CONTRIBUTORS**

20  
21 ATR, L-SC, and LJB conceptualized and designed the study. ATR and DP led participant  
22 recruitment and data collection. EB led the group model building sessions and synthesis of  
23 qualitative data. ATR analyzed the qualitative and quantitative data and drafted the initial  
24 manuscript. ATR, DP, EB, L-SC, and LJB contributed to manuscript revisions and approved the  
25 final manuscript.  
26  
27  
28  
29  
30  
31  
32  
33  
34

## 35 **FUNDING**

36  
37 Research reported in this paper was supported by National Institute on Drug Abuse (NIDA)  
38 grants K12DA041449, R01DA036583, R01DA038076, National Cancer Institute (NCI) grants  
39 U19CA203654, P30CA091842, and P30CA091842-16S2, and a grant from the Foundation for  
40 Barnes-Jewish Hospital.  
41  
42  
43  
44  
45  
46  
47  
48

## 49 **COMPETING INTERESTS**

50  
51 LJB is listed as an inventor on Issued U.S. Patent 8,080,371, “Markers for Addiction” covering  
52 the use of certain SNPs in determining the diagnosis, prognosis, and treatment of addiction. The  
53 other authors have no financial disclosures.  
54  
55  
56  
57  
58  
59  
60

## ETHICS APPROVAL

This study was approved by an institutional review board in the Human Research Protection Office at Washington University in St. Louis (IRB ID: 201703162).

## DATA SHARING

Additional data may be available by emailing aramsey [at] wustl [dot] edu.

## REFERENCES

1. Samet JM. Tobacco smoking: the leading cause of preventable disease worldwide. *Thorac Surg Clin*. 2013;23(2):103-12.
2. Bauer UE, Briss PA, Goodman RA, et al. Prevention of chronic disease in the 21st century: elimination of the leading preventable causes of premature death and disability in the USA. *Lancet*. 2014;384(9937):45-52.
3. Yoon PW, Bastian B, Anderson RN, et al. Potentially preventable deaths from the five leading causes of death--United States, 2008-2010. *MMWR*. 2014;63(17):369-74.
4. Surgeon General. The health consequences of smoking—50 years of progress: A report of the Surgeon General. <https://www.surgeongeneral.gov/library/reports/50-years-of-progress/index.html>. Accessed June 22, 2018.
5. Centers for Disease Control and Prevention. Trends in current cigarette smoking among high school students and adults, United States, 1965–2014. [http://www.cdc.gov/tobacco/data\\_statistics/tables/trends/index.htm](http://www.cdc.gov/tobacco/data_statistics/tables/trends/index.htm). Accessed June 22, 2018.
6. America's Health Rankings. Health measures in the United States 2018 annual report. <https://www.americashealthrankings.org/explore/annual/measure/Overall>. Accessed December 14, 2018.
7. Froehlich-Grobe K, Jones D, Businelle MS, et al. Impact of disability and chronic conditions on health. *Disability and Health Journal*. 2016;9(4), 600-608.
8. Srivastava AB, Ramsey AT, McIntosh, LD, et al. Tobacco use prevalence and smoking cessation pharmacotherapy prescription patterns among hospitalized patients by medical specialty. *Nicotine Tob Res*. 2018. doi:10.1093/ntr/nty031
9. Nahhas GJ, Wilson D, Talbot V, et al. Feasibility of implementing a hospital-based “opt-out” tobacco-cessation service. *Nicotine Tob Res*. 2016;19(8):937-43.

10. Rigotti NA, Clair C, Munafò MR, et al. Interventions for smoking cessation in hospitalised patients. *Cochrane Database Syst Rev*. 2012;5.
11. Cahill K, Stevens S, Perera R, et al. Pharmacological interventions for smoking cessation: an overview and network meta-analysis. *Cochrane Database Syst Rev*. 2013;5
12. Stead LF, Perera R, Bullen C, et al. Nicotine replacement therapy for smoking cessation. *Cochrane Database Syst Rev*. 2012;11.
13. Keating GM, Lyseng-Williamson KA. Varenicline. *Pharmacocon*. 2010;28(3):231-54.
14. Stead L, Lancaster T. Combined pharmacotherapy and behavioural interventions for smoking cessation. *J Evid-Based Med*. 2012;5(4):242–242.
15. Fiore MC, Goplerud E, Schroeder SA. The Joint Commission's new tobacco-cessation measures—will hospitals do the right thing?. *N Engl J Med*. 2012;366(13):1172-4.
16. Katz DA, Stewart K, Paez M, et al. “Let me get you a nicotine patch”: nurses' perceptions of implementing smoking cessation guidelines for hospitalized veterans. *Mil Med*. 2016;181(4):373-82.
17. Pack QR, Priya A, Lagu TC, et al. Smoking cessation pharmacotherapy among smokers hospitalized for coronary heart disease. *JAMA Intern Med*. 2017;177(10):1525-7.
18. Diez Roux AV. Complex systems thinking and current impasses in health disparities research. *Am J Public Health*. 2011;101(9):1627-34.
19. Powell BJ, Beidas RS, Lewis CC, et al. Methods to improve the selection and tailoring of implementation strategies. *J Behav Health Serv Res*. 2017;44(2):177-94.
20. Geerligs L, Rankin NM, Shepherd HL, et al. Hospital-based interventions: a systematic review of staff-reported barriers and facilitators to implementation processes. *Implement Sci*. 2018;13(1):36.
21. Zimmerman L, Lounsbury DW, Rosen CS, et al. Participatory system dynamics modeling: Increasing stakeholder engagement and precision to improve implementation planning in systems. *Adm Policy Ment Health*. 2016;43(6):834-49.
22. Hovmand PS. *Community Based System Dynamics*. New York, NY: Springer; 2014.
23. Hovmand PS, Andersen DF, Rouwette E, et al. Group model-building ‘scripts’ as a collaborative planning tool. *Syst Res Behav Sci*. 2012;29(2):179-93.
24. Luna-Reyes LF, Martinez-Moyano IJ, Pardo TA, et al. Anatomy of a group model-building intervention: building dynamic theory from case study research. *Syst Dyn Rev*. 2006;22(4):291–320.

- 1
- 2
- 3
- 4 25. NIH Office of Behavioral and Social Sciences. *Best practices for mixed methods research*
- 5 *in the health sciences* (2nd ed). Bethesda: National Institutes of Health; 2018.
- 6
- 7 26. Chen LS, Baker T, Brownson RC, et al. Smoking cessation and electronic cigarettes in
- 8 community mental health centers: patient and provider perspectives. *Community Ment*
- 9 *Health J.* 2017;53(6):695-702.
- 10
- 11 27. Fiore MC, Baker TB. Treating smokers in the health care setting. *N Engl J Med.*
- 12 2011;365(13):1222-31.
- 13
- 14 28. Fiore MC, Jaén CR, Baker TB, et al. *Treating Tobacco Use and Dependence: 2008 Update.*
- 15 US Department of Health and Human Services; 2008.
- 16
- 17 29. Meadows D. Leverage Points: Places to intervene in a system. *Sustainability Institute.*
- 18 1999.
- 19
- 20
- 21 30. Michie S, Atkins L, West R. *The Behavior Change Wheel: A Guide to Designing*
- 22 *Interventions.* Great Britain: Silverback Publishing; 2014.
- 23
- 24 31. Sharpe T, Alsahlanee A, Ward KD, et al. Systematic review of clinician-reported barriers to
- 25 provision of smoking cessation interventions in hospital inpatient settings. *J Smok Cessat.*
- 26 2018;13(4):233-243.
- 27
- 28 32. Regan S, Viana JC, Reyen M, et al. Prevalence and predictors of smoking by inpatients
- 29 during a hospital stay. *Arch Intern Med.* 2012;26;172(21):1670-4.
- 30
- 31 33. Bernstein SL, Rosner J, DeWitt M, et al. Design and implementation of decision support for
- 32 tobacco dependence treatment in an inpatient electronic medical record: a randomized trial.
- 33 *Transl Behav Med.* 2017;7(2):185-95.
- 34
- 35 34. Rice VH, Heath L, Livingstone-Banks J, et al. Nursing interventions for smoking cessation.
- 36 *Cochrane Libr.* 2017;12.
- 37
- 38 35. Slattery C, Freund M, Gillham K, et al. Increasing smoking cessation care across a network
- 39 of hospitals: an implementation study. *Implement Sci.* 2016;11(1):28.
- 40
- 41 36. Streck JM, Chang Y, Tindle HA, et al. Smoking cessation after hospital discharge: Factors
- 42 associated with abstinence. *J Hosp Med.* 2018;13(11):774-8.
- 43
- 44
- 45
- 46
- 47
- 48
- 49
- 50
- 51
- 52
- 53
- 54
- 55
- 56
- 57
- 58
- 59
- 60

1  
2  
3 **Figure 1.** Providers and patients report discrepant rates of inpatient smoking cessation treatment  
4  
5  
6  
7  
8  
9  
10

11 **Figure 2.** Despite high interest, fewer patients receive pharmacologic cessation treatment than  
12 indicated by providers  
13  
14  
15

16  
17  
18  
19  
20 **Figure 3.** Potential strategies prioritized by importance and feasibility among stakeholders  
21  
22  
23  
24  
25  
26  
27  
28  
29  
30  
31  
32  
33  
34  
35  
36  
37  
38  
39  
40  
41  
42  
43  
44  
45  
46  
47  
48  
49  
50  
51  
52  
53  
54  
55  
56  
57  
58  
59  
60

**Figure 1. Providers and patients report discrepant rates of inpatient smoking cessation treatment**

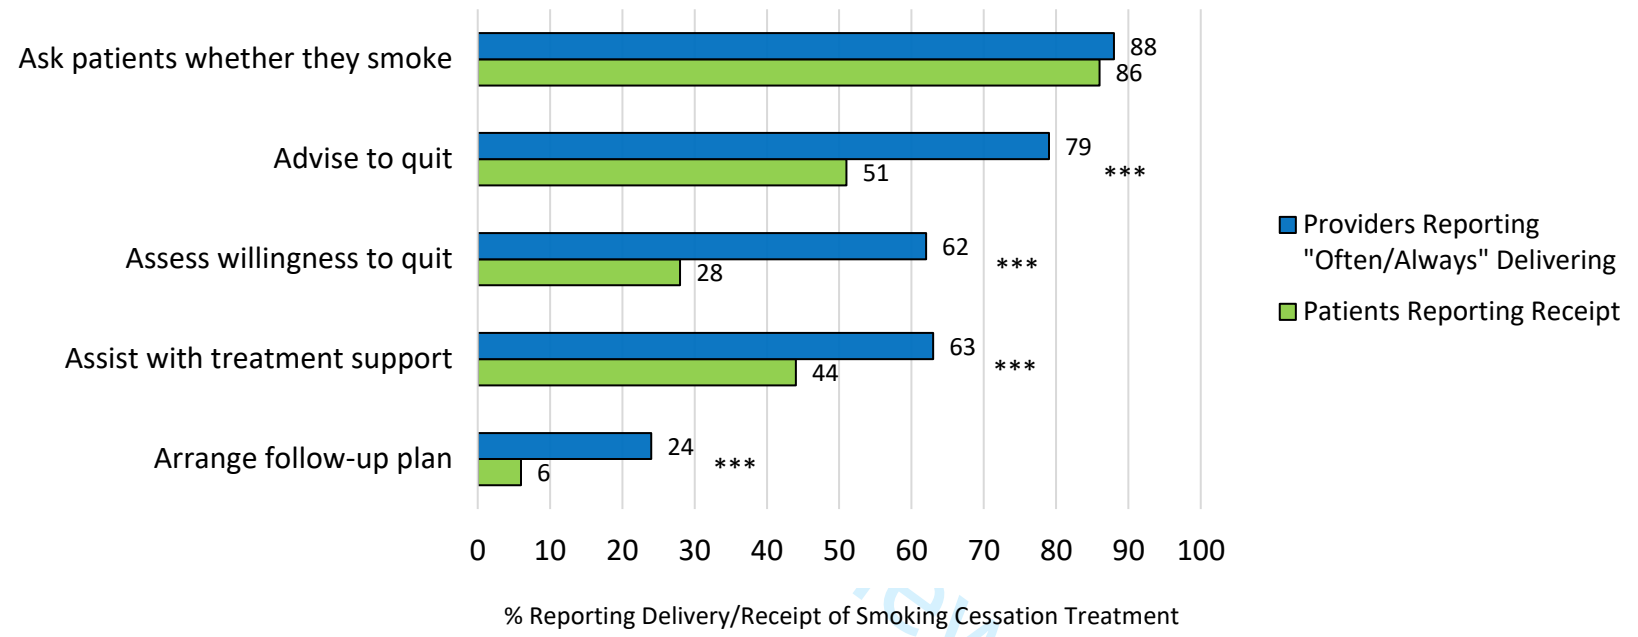

\*\*\*  $p < .001$

Peer review only



**Figure 2. Despite high interest, fewer patients receive pharmacologic cessation treatment than indicated by providers**

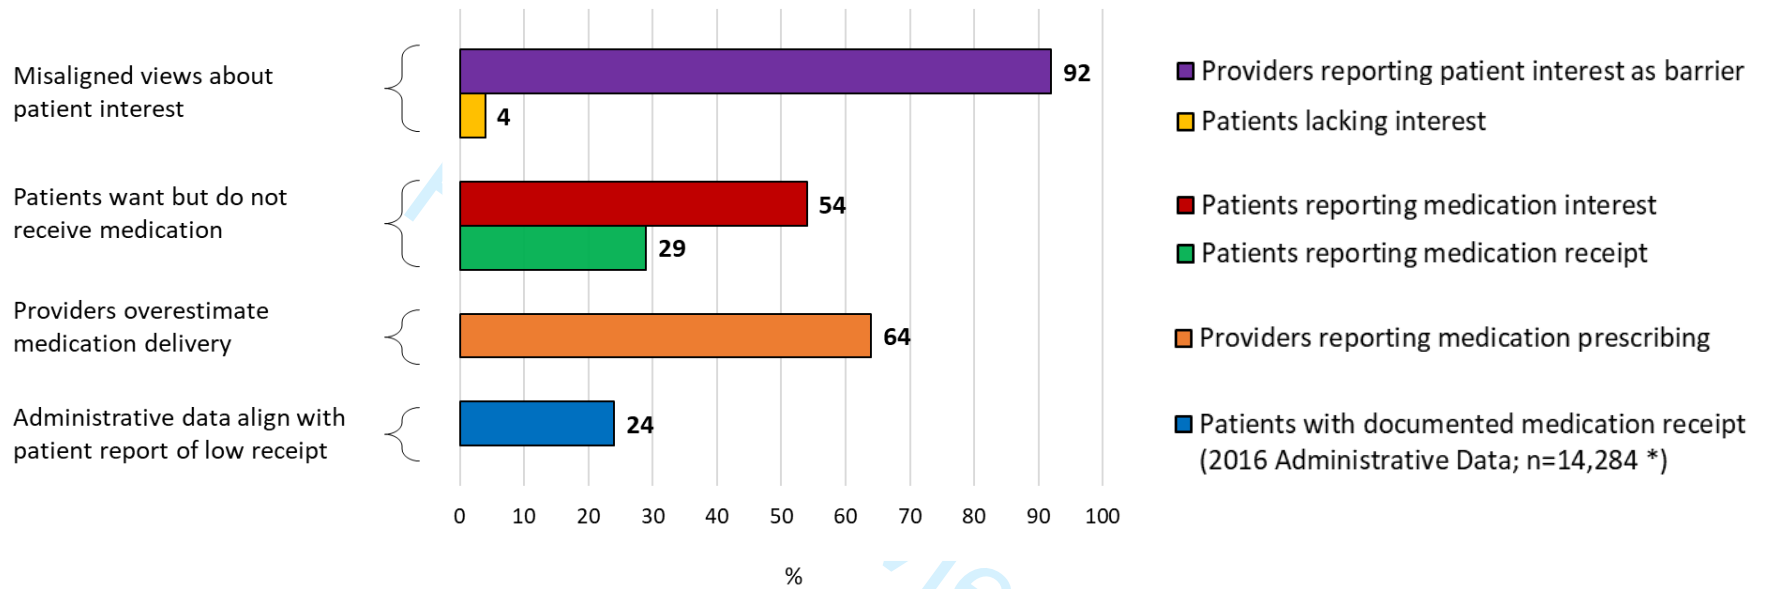

\* Adapted from Srivastava et al., 2018 [9]

Figure 3. Potential strategies prioritized by importance and feasibility among stakeholders

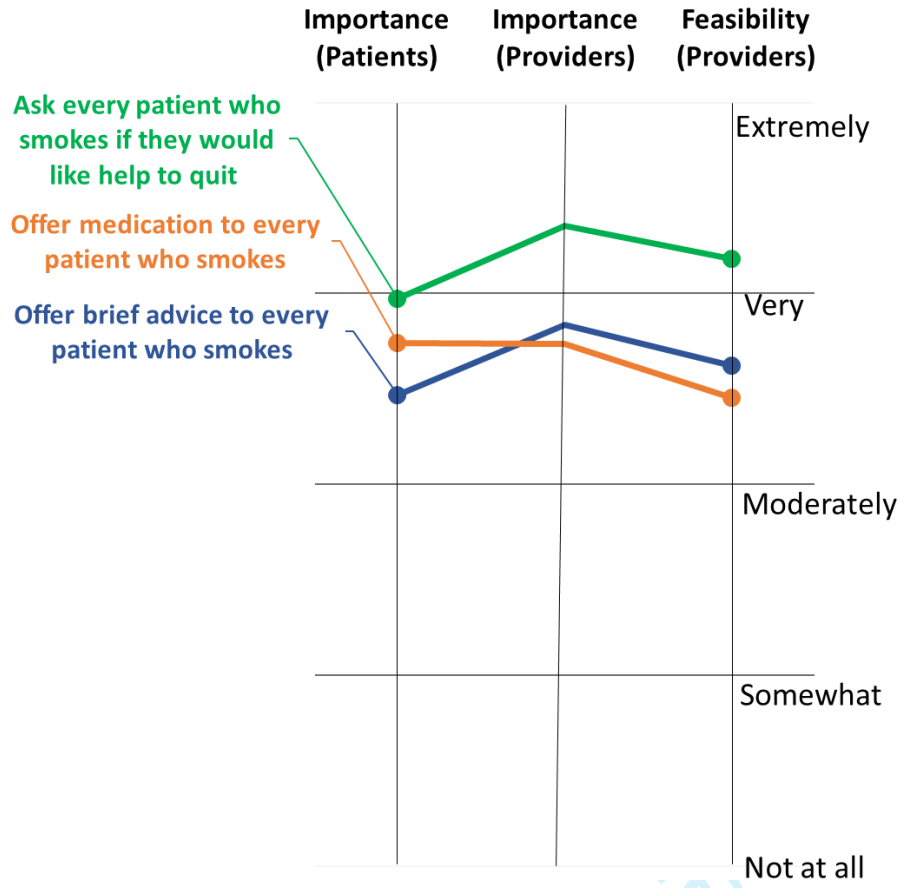

ew only

## Supplementary File 1. Backbone Structure to Guide the Group Model Building Sessions

### Backbone Structure:

Patients who smoke are identified via intake assessment and can either receive an order for treatment or not. Those who are prescribed treatment can accept or refuse it. Those who accept it can either continue or discontinue treatment after discharge.

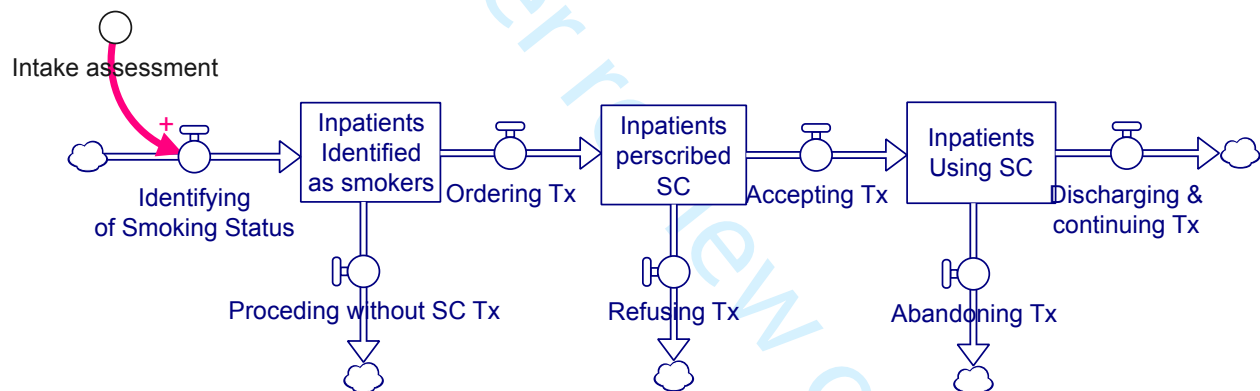

### Sample Semi-Structured Prompt:

*“What factors determine the likelihood that a patient’s smoking will be treated? ...*

*... In other words, what barriers might disrupt this process of [a patient who smokes receiving treatment / providing treatment to a patient who smokes]?”*

## Standards for Reporting Qualitative Research (SRQR)

O'Brien B.C., Harris, I.B., Beckman, T.J., Reed, D.A., & Cook, D.A. (2014). Standards for reporting qualitative research: a synthesis of recommendations. *Academic Medicine*, 89(9), 1245-1251.

| No. | Topic                                       | Item                                                                                                                                                                                                                                                                                                                                     | Status    | Page  |
|-----|---------------------------------------------|------------------------------------------------------------------------------------------------------------------------------------------------------------------------------------------------------------------------------------------------------------------------------------------------------------------------------------------|-----------|-------|
|     | <b>Title and abstract</b>                   |                                                                                                                                                                                                                                                                                                                                          |           |       |
| S1  | Title                                       | Concise description of the nature and topic of the study identifying the study as qualitative or indicating the approach (e.g., ethnography, grounded theory) or data collection methods (e.g., interview, focus group) is recommended                                                                                                   | Addressed | 1     |
| S2  | Abstract                                    | Summary of key elements of the study using the abstract format of the intended publication; typically includes objective, methods, results, and conclusions                                                                                                                                                                              | Addressed | 2-3   |
|     | <b>Introduction</b>                         |                                                                                                                                                                                                                                                                                                                                          |           |       |
| S3  | Problem formulation                         | Description and significance of the problem/phenomenon studied; review of relevant theory and empirical work; problem statement                                                                                                                                                                                                          | Addressed | 4-5   |
| S4  | Purpose or research question                | Purpose of the study and specific objectives or questions                                                                                                                                                                                                                                                                                | Addressed | 5-6   |
|     | <b>Methods</b>                              |                                                                                                                                                                                                                                                                                                                                          |           |       |
| S5  | Qualitative approach and research paradigm  | Qualitative approach (e.g., ethnography, grounded theory, case study, phenomenology, narrative research) and guiding theory if appropriate; identifying the research paradigm (e.g., positivist, constructivist/interpretivist) is also recommended                                                                                      | Addressed | 6-8   |
| S6  | Researcher characteristics and reflexivity  | Researchers' characteristics that may influence the research, including personal attributes, qualifications/experience, relationship with participants, assumptions, or presuppositions; potential or actual interaction between researchers' characteristics and the research questions, approach, methods, results, or transferability | Addressed | 7, 11 |
| S7  | Context                                     | Setting/site and salient contextual factors; rationale                                                                                                                                                                                                                                                                                   | Addressed | 6-9   |
| S8  | Sampling strategy                           | How and why research participants, documents, or events were selected; criteria for deciding when no further sampling was necessary (e.g., sampling saturation); rationale <sup>a</sup>                                                                                                                                                  | Addressed | 6-10  |
| S9  | Ethical issues pertaining to human subjects | Documentation of approval by an appropriate ethics review board and participant consent, or explanation for lack thereof; other confidentiality and data security issues                                                                                                                                                                 | Addressed | 22-23 |
| S10 | Data collection                             | Types of data collected; details of data collection                                                                                                                                                                                                                                                                                      | Addressed | 7-10  |

|                                                                                                                                                                                                                                                                                                                                                             |                                                                                              |                                                                                                                                                                                                                                                                                                       |           |        |
|-------------------------------------------------------------------------------------------------------------------------------------------------------------------------------------------------------------------------------------------------------------------------------------------------------------------------------------------------------------|----------------------------------------------------------------------------------------------|-------------------------------------------------------------------------------------------------------------------------------------------------------------------------------------------------------------------------------------------------------------------------------------------------------|-----------|--------|
| 1<br>2<br>3<br>4<br>5<br>6<br>7<br>8<br>9<br>10<br>11<br>12<br>13<br>14<br>15<br>16<br>17<br>18<br>19<br>20<br>21<br>22<br>23<br>24<br>25<br>26<br>27<br>28<br>29<br>30<br>31<br>32<br>33<br>34<br>35<br>36<br>37<br>38<br>39<br>40<br>41<br>42<br>43<br>44<br>45<br>46<br>47<br>48<br>49<br>50<br>51<br>52<br>53<br>54<br>55<br>56<br>57<br>58<br>59<br>60 | methods                                                                                      | procedures including (as appropriate) start and stop dates of data collection and analysis, iterative process, triangulation of sources/methods, and modification of procedures in response to evolving study findings; rationale <sup>a</sup>                                                        |           |        |
| S11                                                                                                                                                                                                                                                                                                                                                         | Data collection instruments and technologies                                                 | Description of instruments (e.g., interview guides, questionnaires) and devices (e.g., audio recorders) used for data collection; if/how the instrument(s) changed over the course of the study                                                                                                       | Addressed | 7-10   |
| S12                                                                                                                                                                                                                                                                                                                                                         | Units of study                                                                               | Number and relevant characteristics of participants, documents, or events included in the study; level of participation (could be reported in results)                                                                                                                                                | Addressed | 7-10   |
| S13                                                                                                                                                                                                                                                                                                                                                         | Data processing                                                                              | Methods for processing data prior to and during analysis, including transcription, data entry, data management and security, verification of data integrity, data coding, and anonymization/deidentification of excerpts                                                                              | Addressed | 7,8,10 |
| S14                                                                                                                                                                                                                                                                                                                                                         | Data analysis                                                                                | Process by which inferences, themes, etc., were identified and developed, including researchers involved in data analysis; usually references a specific paradigm or approach; rationale <sup>a</sup>                                                                                                 | Addressed | 8,10   |
| S15                                                                                                                                                                                                                                                                                                                                                         | Techniques to enhance trustworthiness                                                        | Techniques to enhance trustworthiness and credibility of data analysis (e.g., member checking, audit trail, triangulation); rationale <sup>a</sup>                                                                                                                                                    | Addressed | 7,8,10 |
| <b>Results/Findings</b>                                                                                                                                                                                                                                                                                                                                     |                                                                                              |                                                                                                                                                                                                                                                                                                       |           |        |
| S16                                                                                                                                                                                                                                                                                                                                                         | Synthesis and interpretation                                                                 | Main findings (e.g., interpretations, inferences, and themes); might include development of a theory or model, or integration with prior research or theory                                                                                                                                           | Addressed | 11-17  |
| S17                                                                                                                                                                                                                                                                                                                                                         | Links to empirical data                                                                      | Evidence (e.g., quotes, field notes, text excerpts, photographs) to substantiate analytic findings                                                                                                                                                                                                    | Addressed | 11-17  |
| <b>Discussion</b>                                                                                                                                                                                                                                                                                                                                           |                                                                                              |                                                                                                                                                                                                                                                                                                       |           |        |
| S18                                                                                                                                                                                                                                                                                                                                                         | Integration with prior work, implications, transferability, and contribution(s) to the field | Short summary of main findings; explanation of how findings and conclusions connect to, support, elaborate on, or challenge conclusions of earlier scholarship; discussion of scope of application/generalizability; identification of unique contribution(s) to scholarship in a discipline or field | Addressed | 17-22  |
| S19                                                                                                                                                                                                                                                                                                                                                         | Limitations                                                                                  | Trustworthiness and limitations of findings                                                                                                                                                                                                                                                           | Addressed | 20     |
| <b>Other</b>                                                                                                                                                                                                                                                                                                                                                |                                                                                              |                                                                                                                                                                                                                                                                                                       |           |        |
| S20                                                                                                                                                                                                                                                                                                                                                         | Conflicts of interest                                                                        | Potential sources of influence or perceived influence on study conduct and conclusions; how these were managed                                                                                                                                                                                        | Addressed | 22     |
| S21                                                                                                                                                                                                                                                                                                                                                         | Funding                                                                                      | Sources of funding and other support; role of funders in data collection, interpretation, and reporting                                                                                                                                                                                               | Addressed | 22     |
