# Supplementary material for: Leverage points to improve smoking cessation treatment in a large tertiary care hospital: a systems-based mixed methods study
Source: PubMed Central journal article supplement — BMJ Open. 2019 Jul 2;9(7):e030066. doi: 10.1136/bmjopen-2019-030066 (PMC6609123; doi:10.1136/bmjopen-2019-030066), 2019-07-02
Supplement: bmjopen-2019-030066supp001.pdf [file bmjopen-2019-030066supp001.pdf]

## Supplementary File 1. Backbone Structure to Guide the Group Model Building Sessions

### Backbone Structure:

Patients who smoke are identified via intake assessment and can either receive an order for treatment or not. Those who are prescribed treatment can accept or refuse it. Those who accept it can either continue or discontinue treatment after discharge.

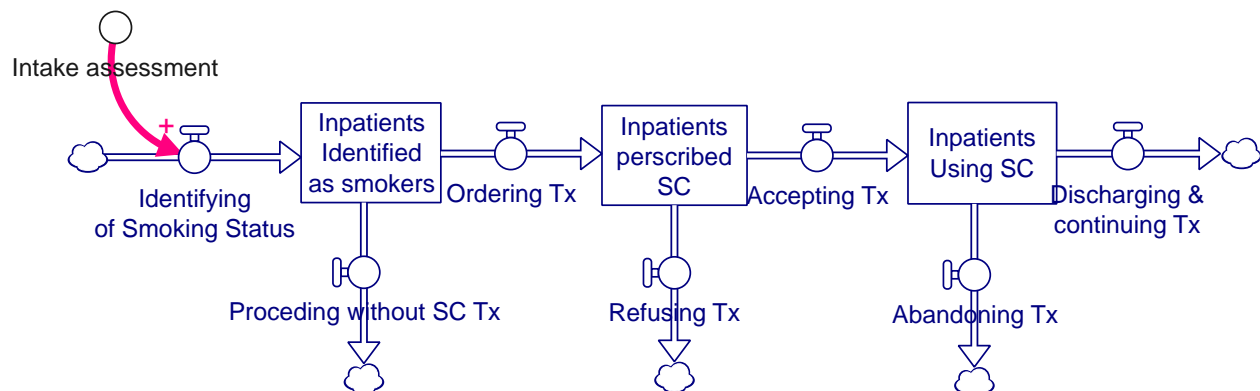

### Sample Semi-Structured Prompt:

*“What factors determine the likelihood that a patient’s smoking will be treated? ...*

*... In other words, what barriers might disrupt this process of [a patient who smokes receiving treatment / providing treatment to a patient who smokes]?”*
